# Supplementary material for: Prediction-based highly sensitive CRISPR off-target validation using target-specific DNA enrichment
Source: PubMed Central journal article supplement (PMC7368065; doi:10.1038/s41467-020-17418-8), 2020-07-17
Supplement: 41467_2020_17418_MOESM1_ESM.pdf [file 41467_2020_17418_MOESM1_ESM.pdf]

## Supplementary Tables

### Supplementary Table 1. Sequence information for crRNAs used in this study.

Direct repeat sequences of the AsCas12a and SpCas9 in guide RNAs are shown in blue.

| target           | crRNA Sequence |                                                                                                                         |    |
|------------------|----------------|-------------------------------------------------------------------------------------------------------------------------|----|
| AGBL1 on         | 5`             | GAAUUUCUACUCUUGUAGAU GAUUGAAGGAAAAGUUACAAAGG                                                                            | 3` |
| RPL32P3 on       | 5`             | GAAUUUCUACUCUUGUAGAU GGGUGAUCAGACCCAACAGCAGG                                                                            | 3` |
| RPL32P3 off1     | 5`             | GAAUUUCUACUCUUGUAGAU GGGUGAUCAGACCCAACACCAGG                                                                            | 3` |
| RPL32P3 off2     | 5`             | GAAUUUCUACUCUUGUAGAU GGGUGAUCAGACCCAACACCAGG                                                                            | 3` |
| RPL32P3 off3     | 5`             | GAAUUUCUACUCUUGUAGAU GGGUGAUCAGACCCAACACCAGG                                                                            | 3` |
| RPL32P3 off4     | 5`             | GAAUUUCUACUCUUGUAGAU GGGUGAUCAGGCCCAACACCAGG                                                                            | 3` |
| RPL32P3 off5     | 5`             | GAAUUUCUACUCUUGUAGAU GGGUGAUCAGACCCAACCCCAGG                                                                            | 3` |
| RPL32P3 off6     | 5`             | GAAUUUCUACUCUUGUAGAU GGGUGAUCAGACCUAACACUAGG                                                                            | 3` |
| RPL32P3 off7     | 5`             | GAAUUUCUACUCUUGUAGAU GGGUGAUCCAACCCAACACCAGG                                                                            | 3` |
| RPL32P3 off8     | 5`             | GAAUUUCUACUCUUGUAGAU GGGUGGCCAGACCCAACACCAGG                                                                            | 3` |
| RPL32P3 off9     | 5`             | GAAUUUCUACUCUUGUAGAU GGGUGGACAGACCCAACACCAGG                                                                            | 3` |
| RPL32P3 off10    | 5`             | GAAUUUCUACUCUUGUAGAU GGGUGUUCAGGACCAACAACAGG                                                                            | 3` |
| PSMB2 on         | 5`             | GAAUUUCUACUCUUGUAGAU CUCUGAGUGUACAAAAGAUGGUG                                                                            | 3` |
| PSMB2 off2       | 5`             | GAAUUUCUACUCUUGUAGAU CAAGUAUAUACCCAGUGCUGAGC                                                                            | 3` |
| PSMB2 off3       | 5`             | GAAUUUCUACUCUUGUAGAU CAGGUCACUAAAAAAUUAAAUGA                                                                            | 3` |
| PSMB2 off4       | 5`             | GAAUUUCUACUCUUGUAGAU CAUGUUUACACAUUAUUUAACUC                                                                            | 3` |
| FAT3 on          | 5`             | GAAUUUCUACUCUUGUAGAU AAGGGAAGAAACCCUGAAACUCU                                                                            | 3` |
| FAT3 off3        | 5`             | GAAUUUCUACUCUUGUAGAU AAGGGGACAGCCACUACUGAGGC                                                                            | 3` |
| DNMT1 site3 on   | 5`             | GAAUUUCUACUCUUGUAGAU CUGAUGGUCCAUGUCUGUACUC                                                                             | 3` |
| DNMT1 site3 off1 | 5`             | GAAUUUCUACUCUUGUAGAU CUGAUGGUCCACGCCUGUUAACA                                                                            | 3` |
| DNMT1 site3 off2 | 5`             | GAAUUUCUACUCUUGUAGAU CUGAUGGUCCAUACCUGUUAACA                                                                            | 3` |
| DNMT1 site3 off3 | 5`             | GAAUUUCUACUCUUGUAGAU CUGAUGGUCCAUGUCUGAAUUAG                                                                            | 3` |
| HEK site4 on     | 5              | GGCACUGCGGCUGGAGGUGGGUUUUAG AGC UAG AAA UAG CAA G<br>UUAAA AUAAG GCUAG UCCGU UAUCA ACUUG AAAAA GUGGC ACCGA<br>GUCGG UGC | 3  |
| HEK site4 off1   | 5              | UGCACUGCGGCCGGAGGAGGGUUUUAG AGC UAG AAA UAG CAA G<br>UUAAA AUAAG GCUAG UCCGU UAUCA ACUUG AAAAA GUGGC ACCGA<br>GUCGG UGC | 3  |
| HEK site4 off2   | 5              | GGCAUCACGGCUGGAGGUGGGUUUUAG AGC UAG AAA UAG CAA G<br>UUAAA AUAAG GCUAG UCCGU UAUCA ACUUG AAAAA GUGGC ACCGA<br>GUCGG UGC | 3  |

|                              |   |                                                                                                                           |   |
|------------------------------|---|---------------------------------------------------------------------------------------------------------------------------|---|
| HEK site4 off3               | 5 | AGCAGUGCGGCUAGAGGUGGGUUUUUAG AGC UAG AAA UAG CAA G<br>UUAAA AUAAG GCUAG UCCGU UAUCA ACUUG AAAAA GUGGC ACCGA<br>GUCGG UGC  | 3 |
| HEK site4 off4               | 5 | GGCACUGAGAAAGGAGGUGGGUUUUUAG AGC UAG AAA UAG CAA G<br>UUAAA AUAAG GCUAG UCCGU UAUCA ACUUG AAAAA GUGGC ACCGA<br>GUCGG UGC  | 3 |
| HEK site4 off5               | 5 | GGGCAUGCGGCUAGGAGGUGGGUUUUUAG AGC UAG AAA UAG CAA G<br>UUAAA AUAAG GCUAG UCCGU UAUCA ACUUG AAAAA GUGGC ACCGA<br>GUCGG UGC | 3 |
| HEK site4 off6               | 5 | GGCACAGGGGCGUGGAGGUGGGUUUUUAG AGC UAG AAA UAG CAA G<br>UUAAA AUAAG GCUAG UCCGU UAUCA ACUUG AAAAA GUGGC ACCGA<br>GUCGG UGC | 3 |
| RNF2 on                      | 5 | GUCAUCUAGUCAUUACCUGUUUUUAG AGC UAG AAA UAG CAA G<br>UUAAA AUAAG GCUAG UCCGU UAUCA ACUUG AAAAA GUGGC ACCGA<br>GUCGG UGC    | 3 |
| RNF2 off1                    | 5 | GGUAUCUAAGUCAUUACCUGUUUUUAG AGC UAG AAA UAG CAA G<br>UUAAA AUAAG GCUAG UCCGU UAUCA ACUUG AAAAA GUGGC ACCGA<br>GUCGG UGC   | 3 |
| RNF2 off2                    | 5 | GUAUCUGAGUCAUUUCCTGUUUUUAG AGC UAG AAA UAG CAA G<br>UUAAA AUAAG GCUAG UCCGU UAUCA ACUUG AAAAA GUGGC ACCGA<br>GUCGG UGC    | 3 |
| RNF2 off3                    | 5 | GUCAUCCUAGUGCUUACCUGUUUUUAG AGC UAG AAA UAG CAA G<br>UUAAA AUAAG GCUAG UCCGU UAUCA ACUUG AAAAA GUGGC ACCGA<br>GUCGG UGC   | 3 |
| ZNF609 (Spacer 8)            | 5 | CCCCACCAAAGCCCATGTAGUUUUUAG AGC UAG AAA UAG CAA G<br>UUAAA AUAAG GCUAG UCCGU UAUCA ACUUG AAAAA GUGGC ACCGA<br>GUCGG UGC   | 3 |
| RP11-77I22.4<br>(Spacer 15A) | 5 | GGCAGTGCAGATGAAAACTGUUUUUAG AGC UAG AAA UAG CAA G<br>UUAAA AUAAG GCUAG UCCGU UAUCA ACUUG AAAAA GUGGC ACCGA<br>GUCGG UGC   | 3 |

**Supplementary Table 2. Sequence information for DNA targets amplified in this study.** PAM sequences (TTTN for AsCas12a and NGG for SpCas9 effector) are shown in blue color and mismatched sequence to each on-target sites are shown in red color respectively.

| Target name   | Mismatch | Sequence                                                | Position |           | Direction |
|---------------|----------|---------------------------------------------------------|----------|-----------|-----------|
| AGBL1 on      | -        | TTTA GATTGAAGGAAAGTTACAAAGG                             | chr15    | 86124495  | -         |
| RPL32P3 on    | -        | TTTG GGGTGATCAGACCCAACAGCAGG                            | chr3     | 129389649 | -         |
| RPL32P3 off1  | 1        | TTTG GGGTGATCAGACCCAACA <b>c</b> CAGG                   | chr8     | 108739813 | +         |
| RPL32P3 off2  | 1        | TTTG GGGTGATCAGACCCAACA <b>c</b> CAGG                   | chr2     | 88944272  | -         |
| RPL32P3 off3  | 1        | TTTG GGGTGATCAGACCCAACA <b>c</b> CAGG                   | chr6     | 33355560  | -         |
| RPL32P3 off4  | 2        | TTTG GGGTGATCAG <b>g</b> CCCAACA <b>c</b> CAGG          | chr1     | 205858150 | -         |
| RPL32P3 off5  | 2        | TTTG GGGTGATCAGACCCAAC <b>cc</b> CAGG                   | chr15    | 78621826  | +         |
| RPL32P3 off6  | 3        | TTTG GGGTGATCAGAC <b>ct</b> AACA <b>ct</b> AGG          | chr3     | 109693289 | -         |
| RPL32P3 off7  | 3        | TTTG GGGTGATC <b>ca</b> ACCCAACA <b>c</b> CAGG          | chr4     | 43472802  | -         |
| RPL32P3 off8  | 3        | TTTG GGGTG <b>gc</b> CAGACCCAACA <b>c</b> CAGG          | chr19    | 53480825  | +         |
| RPL32P3 off9  | 3        | TTTG GGGTG <b>ga</b> CAGACCCAACA <b>c</b> CAGG          | chr20    | 42901255  | -         |
| RPL32P3 off10 | 4        | TTTT GGGTG <b>t</b> TCAG <b>ga</b> CCAACA <b>a</b> CAGG | chr12    | 133092583 | +         |

|                           |   |                                     |       |            |   |
|---------------------------|---|-------------------------------------|-------|------------|---|
| PSMB2 on                  | - | GTAAACAAAGCATAGACTGA <b>GGG</b>     | chr1  | 35631454   | + |
| PSMB2 off2                | 3 | GcAAACAAAaCagAGACTGA <b>AGG</b>     | chr3  | 77072677   | - |
| PSMB2 off3                | 3 | GTAAACAAcaCagAGACTGA <b>AGG</b>     | chr7  | 112493828  | - |
| PSMB2 off4                | 3 | GgAAACAgaGCATAGAaTGA <b>TGG</b>     | chr1  | 208960762  | + |
| FAT3 on                   | - | GAGCTGCTTAAGCATTTCaA <b>GGG</b>     | chr11 | 92532744   | - |
| FAT3 off3                 | 3 | GAGaTGCagAAGCATTTCaA <b>GGG</b>     | chr18 | 25854400   | + |
| DNMT1 site3 on            | - | <b>TTTC</b> CTGATGGTCCATGTCTGTACTC  | chr19 | 10,133,766 | - |
| DNMT1 site3 off1          | 5 | <b>TTTC</b> CTGATGGTCCAcGcCTGTTAaca | chrX  | 98291178   | - |
| DNMT1 site3 off2          | 5 | <b>TTTC</b> CTGATGGTCCATacCTGTTAaca | chrX  | 93421364   | - |
| DNMT1 site3 off3          | 6 | <b>TTTC</b> CTGATGGTCCATGTCTGaattag | chr1  | 213204013  | + |
| HEK site4 on              | - | GGCACTGCGGCTGGAGGTGG <b>GGG</b>     | chr20 | 32761949   | + |
| HEK site4 off1            | 3 | tGCACTGCGGcGGAGGaGG <b>TGG</b>      | chr20 | 61435489   | + |
| HEK site4 off2            | 3 | GGCAAtcaCGGCTGGAGGTGG <b>AGG</b>    | chr10 | 75343344   | + |
| HEK site4 off3            | 3 | aGCAgTGCgGCTaGAGGTGG <b>TGG</b>     | chr13 | 38688774   | + |
| HEK site4 off4            | 4 | GGCACTGaGaaaGGAGGTGG <b>AGG</b>     | chr12 | 55034151   | + |
| HEK site4 off5            | 4 | GGgcaTGCgGCTGGaAGTGG <b>TGG</b>     | chr22 | 41224051   | + |
| HEK site4 off6            | 2 | GGCACaGgGGCTGGAGGTGG <b>GGC</b>     | chr3  | 195823597  | - |
| RNF2 on                   | - | GTCATCTTAGTCATTACCTG <b>AGG</b>     | chr1  | 185087634  | - |
| RNF2 off1                 | 3 | GgtATCTaAGTCATTACCTG <b>TGG</b>     | chr5  | 92701252   | - |
| RNF2 off2                 | 3 | GTaATCTgAGTCATTtCCTG <b>GGG</b>     | chr10 | 129047186  | + |
| RNF2 off3                 | 3 | GTCATCcTAGTgcTTACCTG <b>AGG</b>     | chr8  | 755959     | + |
| ZNF609 (Spacer 8A)        | - | CCCCACCAAAGCCCATGTA <b>AGG</b>      | chr15 | 64593305   | + |
| RP11-77122.4 (Spacer 15A) | - | GGCAGTGCAGATGAAAACT <b>GGG</b>      | chr12 | 30862020   | - |

**Supplementary Table 3. Sequence information for DNA primers used in this study.** Primer sequence information to amplify the target gene was indicated. The base sequences of the forward and reverse adapter primers used in the next generation sequencing are shown in green and blue, respectively.

| Target gene<br>(primer direction) | DNA sequence (5' to 3')   |
|-----------------------------------|---------------------------|
| AGBL1 on-target F1                | TGCCCTGCCATTATAGACTGTT    |
| AGBL1 on-target R1                | AAAATACAAAATGTAGCGGGGCA   |
| AGBL1 on-target F2                | CATTACAACCTTCTTCTGTTTGTCT |
| AGBL1 on-target R2                | ACCAGAGTGAGACTCTGTCT      |
| FAT3 on-target F1                 | AGGAGTTTGAAGCTGTAGTAAG    |
| FAT3 on-target F2                 | CGGGAGACTCTGTCTCTTAA      |
| FAT3 on-target R1                 | AACCCGCCTTTTGTACAAAGTT    |
| FAT3 on-target R2                 | CAAACTTCAAACAGAATACATGTG  |
| FAT3 off-target3 F1               | GAGAATACTGTGCAGCCAGAG     |

|                         |                          |
|-------------------------|--------------------------|
| FAT3 off-target3 F2     | AGAAGTTGAGAGACCCTCAGAA   |
| FAT3 off-target3 R1     | CCAGCACACCTTGGAATCTG     |
| FAT3 off-target3 R2     | GTAACCTCTCCTAACCAGCACA   |
| RPL32P3 on-target F1    | ACCATGTCGTCCTGTATGATC    |
| RPL32P3 on-target F2    | CTTCCTGAAGACACCGATTCT    |
| RPL32P3 on-target R1    | AGAGACCAACAATGACCTGTTT   |
| RPL32P3 on-target R2    | AGAACCTTGACATGAAATGTG    |
| RPL32P3 off-target1 F1  | CAGCAATTGCTATCTGTTGTAGTT |
| RPL32P3 off-target1 F2  | TCTGTTGTAGTTCTTGTGGGTT   |
| RPL32P3 off-target1 R1  | AGTGTTGGGAAGAAAGCTGAG    |
| RPL32P3 off-target1 R2  | TCCTCTGGAATGTGTCTAGACT   |
| RPL32P3 off-target2 F1  | AGTCTCCATTCTGTTCATGCC    |
| RPL32P3 off-target2 F2  | TTCATGCCCCACAATGGTGATAT  |
| RPL32P3 off-target2 R1  | CTCTCCAAGGATCGATTGTATCT  |
| RPL32P3 off-target2 R2  | CTGCTCTCCATTATCTCAAGTA   |
| RPL32P3 off-target3 F1  | GTAAGGGTGCACCCTTCTATA    |
| RPL32P3 off-target3 F2  | GTACCTAGCCTTGCTGAGAA     |
| RPL32P3 off-target3 R1  | CCTTTGGAATGTGTCCAGAC     |
| RPL32P3 off-target3 R2  | TGCTGGCTTCTTGCTTCTAG     |
| RPL32P3 off-target4 F1  | GCAAACTGCTCCACTGTACT     |
| RPL32P3 off-target4 F2  | ACCTTGTTCTTCAGAGTGC      |
| RPL32P3 off-target4 R1  | TGTTGGTTCCTTGCTTCTTACTT  |
| RPL32P3 off-target4 R2  | CCTCCATTATCTCAAGCAGCA    |
| RPL32P3 off-target5 F1  | GTGACAGAGTGAGACTTCATCT   |
| RPL32P3 off-target5 F2  | GGTGGGTGGAAGTTAGTTGA     |
| RPL32P3 off-target5 R1  | ACATTCTTGGGGTTGCAGATG    |
| RPL32P3 off-target5 R2  | CTCTCAGATTGCTCCATCAGAA   |
| RPL32P3 off-target6 F1  | GTAGAGAACTGAAGAAAGATCTGC |
| RPL32P3 off-target6 F2  | AGAGCAGAGGTCTCCATTCTTA   |
| RPL32P3 off-target6 R1  | CACTATTATTGCGTCTAAGTCCTT |
| RPL32P3 off-target6 R2  | CTGGGGTCTAAGGTCTAAAAC    |
| RPL32P3 off-target7 F1  | CTATGGGATACAGCCAAAACAGT  |
| RPL32P3 off-target7 F2  | ACAGCCAAAACAGTACTAAGAG   |
| RPL32P3 off-target7 R1  | TGATAGCTGTGGTGGTTTTACAA  |
| RPL32P3 off-target7 R2  | AGCTGAGTGTTGGGAGAGAA     |
| RPL32P3 off-target8 F1  | TCAGTGCCTACCTGGTAAAGAT   |
| RPL32P3 off-target8 F2  | GTCATCTGTGGACATCTTGAG    |
| RPL32P3 off-target8 R1  | TGATCTCAAGTCGCAGAACAT    |
| RPL32P3 off-target8 R2  | AAGTCGCAGAACATGTTCCATA   |
| RPL32P3 off-target9 F1  | GTGGACATACACAAGTGTTCAT   |
| RPL32P3 off-target9 F2  | GTATGACATTCTGTGATGGGAG   |
| RPL32P3 off-target9 R1  | CCAGGACTGATTGTATCTTGAGT  |
| RPL32P3 off-target9 R2  | CACTATCTCAAGCAGCAGAACA   |
| RPL32P3 off-target10 F1 | CTAACAGAATACGATGCTGCC    |
| RPL32P3 off-target10 F2 | TACGATGCTGCCAATCAAAAGT   |
| RPL32P3 off-target10 R1 | GCTGATACTGCAGTGGTACT     |
| RPL32P3 off-target10 R2 | TTCACAGGCTCCATCTCTCT     |

|                            |                          |
|----------------------------|--------------------------|
| PSMB2 on-target F1         | CTTCATATTGGTGTGTCCCAAC   |
| PSMB2 on-target F2         | AATGAACAAGTAGCAACAGGAGG  |
| PSMB2 on-target R1         | AGCTGGGATTACAGGCATGTAC   |
| PSMB2 on-target R2         | TCCCAAAGCTCTAGGATTACAG   |
| PSMB2 off-target2 F1       | GCCTAGCAGATTATTTTCTGTTC  |
| PSMB2 off-target2 F2       | TTCTGACTTCTGCTACTCATTGC  |
| PSMB2 off-target2 R1       | ACAAACTCAAGACTGTCACTGATT |
| PSMB2 off-target2 R2       | GGTGGGGAACCTTGATCTAG     |
| PSMB2 off-target3 F1       | ACCCGAGCAGCACTACTTTTC    |
| PSMB2 off-target3 F2       | TGCTTGCTCAAACCTGCTATC    |
| PSMB2 off-target3 R1       | CTACAAAGGGTGTGAGAGCA     |
| PSMB2 off-target3 R2       | GGTGGGACTAGGAATTCCTG     |
| PSMB2 off-target4 F1       | CCAAAGGAAGATACAGCAGTGT   |
| PSMB2 off-target4 F2       | GTAGTCAACCTCAGTGTCCAT    |
| PSMB2 off-target4 R1       | AATGCATTTCTGGTTACCCTGTT  |
| PSMB2 off-target4 R2       | GTGTGAAGTGGTCAACTACAAG   |
| DNMT1-site3 on-target F1   | CAAAGCCATTGGCTTGGAGAT    |
| DNMT1-site3 on-target F2   | AGATCAAGCTTTGTATGTTGGCC  |
| DNMT1-site3 on-target R1   | AGAAGTCCCGTGCAAATCAC     |
| DNMT1-site3 on-target R2   | GCAAATCACGAATACCCACCC    |
| DNMT1-site3 off-target1 F1 | TGTTGCAAGTCCCATGAGGA     |
| DNMT1-site3 off-target1 F2 | CAGGGAACCTAATCTCACAAT    |
| DNMT1-site3 off-target1 R1 | GAACAGGAAAGAAAGGAAAATGAG |
| DNMT1-site3 off-target1 R2 | CCTCTTTCCCATGATTCTTCC    |
| DNMT1-site3 off-target2 F1 | AGCAGGTCATTGGCAATGATAC   |
| DNMT1-site3 off-target2 F2 | CAAATGTTTGTGCAGGTTGATGTT |
| DNMT1-site3 off-target2 R1 | GGTTTAGAGCAGGAGTGAAAGT   |
| DNMT1-site3 off-target2 R2 | AAGAAAGGAAAGTTCACCTTGAAG |
| DNMT1-site3 off-target3 F1 | AACCCTGCTACCTACTGAGAAT   |
| DNMT1-site3 off-target3 F2 | CATTAGCCTGTGTTTTACATAAG  |
| DNMT1-site3 off-target3 R1 | TTAATAGCATCAAAGGCAAACCAT |
| DNMT1-site3 off-target3 R2 | ATGATGGGAAAGTGTGCAAATAG  |
| HEK site4 on-target F1     | GCTTACAGGCGATATAAATCATTC |
| HEK site4 on-target F2     | CCACAAGCAGGTAAACAAGCA    |
| HEK site4 on-target R1     | TGGGGGATCAGAAGCCCTAA     |
| HEK site4 on-target R2     | GACGTCCAAAACCAGACTCC     |
| HEK site4 off-target1 F1   | GTCCTGCAGCCTTCATTCTT     |
| HEK site4 off-target1 F2   | GGATTGTGAGATTGTGTAGGCA   |
| HEK site4 off-target1 R1   | TGGAAGGTCACAGAACACATGT   |
| HEK site4 off-target1 R2   | ACATGAGGCAGCTGGTGTCT     |
| HEK site4 off-target2 F1   | GACAAACGGTCACTTAAATGCG   |
| HEK site4 off-target2 F2   | GAGACCCAAGGACTGGGTAA     |
| HEK site4 off-target2 R1   | GCAGCTTTTTCCCAACCTCT     |
| HEK site4 off-target2 R2   | CAAGTCTCTGCCCTAAAGAATC   |
| HEK site4 off-target3 F1   | ATGATGGAGGTGGACCAGTTT    |
| HEK site4 off-target3 F2   | TTCAACCTTACTTCTCCATTCCA  |
| HEK site4 off-target3 R1   | CTTCCTCCAAAGGCCTCTGA     |

|                              |                                                                      |
|------------------------------|----------------------------------------------------------------------|
| HEK site4 off-target3 R2     | AGAATCATCTGAATCCATGTCAGT                                             |
| HEK site4 off-target4 F1     | ATGTCAGCTGACATGTTTCTAATTT                                            |
| HEK site4 off-target4 F2     | CAGTACATGTTGAATACATACACAT                                            |
| HEK site4 off-target4 R1     | TTGGAGAGAAGAGGTTTCAGGA                                               |
| HEK site4 off-target4 R2     | AGCCTGGCCTATTGCTCCTA                                                 |
| HEK site4 off-target5 F1     | CAGCTCTGGCACAAATGAGT                                                 |
| HEK site4 off-target5 F2     | TTGGTGGCAAGAAGTGGCAT                                                 |
| HEK site4 off-target5 R1     | TGGTAGCATCTGGGTTCAAATC                                               |
| HEK site4 off-target5 R2     | CCTGCTGTGACGAGTAGGAA                                                 |
| HEK site4 off-target6 F1     | CTTCTGGAGCTGCCATCTAC                                                 |
| HEK site4 off-target6 F2     | TCCAACCTCTACATTTGTTTCA                                               |
| HEK site4 off-target6 R1     | CAAAATGCTGGGATTACAGGCA                                               |
| HEK site4 off-target6 R2     | AAACATTCATAAGCCGTTATTGCC                                             |
| RNF2 on-target F1            | ATCCAGTGTTAAGCATGTTTGTG                                              |
| RNF2 on-target F2            | CTGTTTTATTCACTGTTTCA                                                 |
| RNF2 on-target R1            | TTATAGCTGCTTCTCTGTGTCA                                               |
| RNF2 on-target R2            | CAAAAGTTTCCATCAAGCCTCTT                                              |
| RNF2 off-target1 F1          | AATTTAGCCCATCACTGGAG                                                 |
| RNF2 off-target1 F2          | GGAGTGAGATGCCATCTTATCA                                               |
| RNF2 off-target1 R1          | AAAAGTCAACATCTGAAACGTGCT                                             |
| RNF2 off-target1 R2          | CTAGATGCTTACCTTTGTGACC                                               |
| RNF2 off-target2 F1          | TCCTCCTGGATACTGATATACTT                                              |
| RNF2 off-target2 F2          | TCTAATGTCCTGGGATGCTTCT                                               |
| RNF2 off-target2 R1          | ATAGGTGCACATGCTACGTTATTA                                             |
| RNF2 off-target2 R2          | TCCGGCTCCAACCAAGTTAA                                                 |
| RNF2 off-target3 F1          | GGAGCTCTTTGTGAATCTGAG                                                |
| RNF2 off-target3 F2          | TTGAAAGAGCAAAGTGTGGG                                                 |
| RNF2 off-target3 R1          | TCCCACAACGACATCGTCTTT                                                |
| RNF2 off-target3 R2          | CTAAACAGCATGAGCCCATCA                                                |
| ZNF609 (Spacer 8A) F1        | GCAGGAGAATTGCTTGAATCTA                                               |
| ZNF609 (Spacer 8A) F2        | TATTCGCTGCACTAACTGTGC                                                |
| ZNF609 (Spacer 8A) R1        | TCACTTGAGTCTAGGAGTTTGA                                               |
| ZNF609 (Spacer 8A) R2        | GACCCTGTCTCAAAAACAAACAA                                              |
| RP11-77I22.4 (Spacer 15A) F1 | TAAGTGTTAAGCTGGAAGGCCA                                               |
| RP11-77I22.4 (Spacer 15A) F2 | AAACATGGAACCCAAAGGAATTG                                              |
| RP11-77I22.4 (Spacer 15A) R1 | TCACTGTTCTGGAGGCTGAGAA                                               |
| RP11-77I22.4 (Spacer 15A) R2 | TGGTGCCTTCTAACTGTGTTT                                                |
| AGBL1_on_Adaptor_F           | ACACTCTTTCCCTACACGACGCTCTTCCGATCT<br>CTTAAGGAAACAGAAGAGAAATCTGCGTG   |
| AGBL1_on_Adaptor_R           | GTGACTGGAGTTCAGACGTGTGCTCTTCCGATCT<br>ATTATAAGATGTTGACAATAACACAACAGG |
| FAT3_on_Adaptor_F            | ACACTCTTTCCCTACACGACGCTCTTCCGATCT<br>GTGGATTGTTTCATTCCAATGATGAAACAA  |
| FAT3_on_Adaptor_R            | GTGACTGGAGTTCAGACGTGTGCTCTTCCGATCT<br>CATTTTGAACAGCCTTCTCCAGAAAACA   |
| FAT3_off3_Adaptor_F          | ACACTCTTTCCCTACACGACGCTCTTCCGATCT<br>GGAAAATGAGCACTTAGCAATCAATTTG    |

|                         |                                                                   |
|-------------------------|-------------------------------------------------------------------|
| FAT3_off3_Adaptor_R     | GTGACTGGAGTTCAGACGTGTGCTCTTCCGATCT<br>CTGTTTCTTTTCTTGTTACTGCAGCA  |
| RPL32P3_on_Adaptor_F    | ACACTCTTTCCCTACACGACGCTCTTCCGATCT<br>TGGGACAGGGTGGGTACCTTG        |
| RPL32P3_on_Adaptor_R    | GTGACTGGAGTTCAGACGTGTGCTCTTCCGATCT<br>ATCCTCACACCTGTTTGTGCA       |
| RPL32P3_off1_Adaptor_F  | ACACTCTTTCCCTACACGACGCTCTTCCGATCT<br>TAGCTAGGGTGACTTGGCTAGCTTG    |
| RPL32P3_off1_Adaptor_R  | GTGACTGGAGTTCAGACGTGTGCTCTTCCGATCT<br>GGTCCCACTTCTCTCTCAAATTGT    |
| RPL32P3_off2_Adaptor_F  | ACACTCTTTCCCTACACGACGCTCTTCCGATCT<br>AAGCCCTGCAAATGTAAAAATCATAACA |
| RPL32P3_off2_Adaptor_R  | GTGACTGGAGTTCAGACGTGTGCTCTTCCGATCT<br>TGCCACATTCTCTCTCAAAGTGC     |
| RPL32P3_off3_Adaptor_F  | ACACTCTTTCCCTACACGACGCTCTTCCGATCT<br>AAAAATCAAGACCTACCCAGTGCAAG   |
| RPL32P3_off3_Adaptor_R  | GTGACTGGAGTTCAGACGTGTGCTCTTCCGATCT<br>CTTTGCAACCTCCATACTAGTATTGGC |
| RPL32P3_off4_Adaptor_F  | ACACTCTTTCCCTACACGACGCTCTTCCGATCT<br>AGCATTTCTTACCATGGTCTTCATAGC  |
| RPL32P3_off4_Adaptor_R  | GTGACTGGAGTTCAGACGTGTGCTCTTCCGATCT<br>TTCGCAGCCTCCAATCTAGTGT      |
| RPL32P3_off5_Adaptor_F  | ACACTCTTTCCCTACACGACGCTCTTCCGATCT<br>GTACCTGGAGGTTTGTATACTGTTCTCT |
| RPL32P3_off5_Adaptor_R  | GTGACTGGAGTTCAGACGTGTGCTCTTCCGATCT<br>GCCTGGTCCCCTTTCTCTCTT       |
| RPL32P3_off6_Adaptor_F  | ACACTCTTTCCCTACACGACGCTCTTCCGATCT<br>ATGCATCCATGTATATTTGGAGCATTCA |
| RPL32P3_off6_Adaptor_R  | GTGACTGGAGTTCAGACGTGTGCTCTTCCGATCT<br>TCTTTTTTGAAAGACCCACCTTATGT  |
| RPL32P3_off7_Adaptor_F  | ACACTCTTTCCCTACACGACGCTCTTCCGATCT<br>ACAAAACCTGAACAAACCTTTAGCCAGA |
| RPL32P3_off7_Adaptor_R  | GTGACTGGAGTTCAGACGTGTGCTCTTCCGATCT<br>GCAGCCTCCATACTAGCATTGG      |
| RPL32P3_off8_Adaptor_F  | ACACTCTTTCCCTACACGACGCTCTTCCGATCT<br>GCTATTAAGTGCATGTTCCCTCAAGG   |
| RPL32P3_off8_Adaptor_R  | GTGACTGGAGTTCAGACGTGTGCTCTTCCGATCT<br>CTGGACCCACCTTATGCATTCTTAAC  |
| RPL32P3_off9_Adaptor_F  | ACACTCTTTCCCTACACGACGCTCTTCCGATCT<br>AGGCACTGTGCTGTCTTACATGTTATT  |
| RPL32P3_off9_Adaptor_R  | GTGACTGGAGTTCAGACGTGTGCTCTTCCGATCT<br>CCTGGACACACTTTCTCTCTCAAAC   |
| RPL32P3_off10_Adaptor_F | ACACTCTTTCCCTACACGACGCTCTTCCGATCT<br>TATGGCTTGTGATTTCTGTTTCCATAAC |
| RPL32P3_off10_Adaptor_R | GTGACTGGAGTTCAGACGTGTGCTCTTCCGATCT<br>AGACCAGGTTTACAGAAGGCTAGAA   |
| PSMB2_on_Adaptor_F      | ACACTCTTTCCCTACACGACGCTCTTCCGATCT<br>AGTAAAGCAGAAGGAATAACAGTGCCC  |

|                            |                                                                    |
|----------------------------|--------------------------------------------------------------------|
| PSMB2_on_Adaptor_R         | GTGACTGGAGTTCAGACGTGTGCTCTTCCGATCT<br>TTCTGTTTGTGGCCAAGAATTGCTGT   |
| PSMB2_off2_Adaptor_F       | ACACTCTTTCCCTACACGACGCTCTTCCGATCT<br>ACACAAACCAAGGGTGATGAAGTTT     |
| PSMB2_off2_Adaptor_R       | GTGACTGGAGTTCAGACGTGTGCTCTTCCGATCT<br>CATAATTTCGAAACATATACACAATGGG |
| PSMB2_off3_Adaptor_F       | ACACTCTTTCCCTACACGACGCTCTTCCGATCT<br>GACAAGAGATTACTAGTGTGCCTAAACA  |
| PSMB2_off3_Adaptor_R       | GTGACTGGAGTTCAGACGTGTGCTCTTCCGATCT<br>TCAGCATTTTCTTCTGTATCATGGGAG  |
| PSMB2_off4_Adaptor_F       | ACACTCTTTCCCTACACGACGCTCTTCCGATCT<br>GGAGGACATTATCTTAAATGAAACAATC  |
| PSMB2_off4_Adaptor_R       | GTGACTGGAGTTCAGACGTGTGCTCTTCCGATCT<br>CCACATTGAACCCAACAAGCAACTT    |
| DNMT1-site3_on_Adaptor_F   | ACACTCTTTCCCTACACGACGCTCTTCCGATCT<br>GTTGCACGTGTCAAGTGCTTAGAG      |
| DNMT1-site3_on_Adaptor_R   | GTGACTGGAGTTCAGACGTGTGCTCTTCCGATCT<br>GACTGAACACTCCTCAAACGGTC      |
| DNMT1-site3_off1_Adaptor_F | ACACTCTTTCCCTACACGACGCTCTTCCGATCT<br>CTACCCCCACCACTAGAAATGCCA      |
| DNMT1-site3_off1_Adaptor_R | GTGACTGGAGTTCAGACGTGTGCTCTTCCGATCT<br>TTTGTCTCTTAACATGCATGCCTAGGAA |
| DNMT1-site3_off2_Adaptor_F | ACACTCTTTCCCTACACGACGCTCTTCCGATCT<br>CCTCAACCACTAAATATGTTATTAGTGGT |
| DNMT1-site3_off2_Adaptor_R | GTGACTGGAGTTCAGACGTGTGCTCTTCCGATCT<br>CCTTTTCCGATGGAGTGACTCAGAAGAT |
| DNMT1-site3_off3_Adaptor_F | ACACTCTTTCCCTACACGACGCTCTTCCGATCT<br>GGTCTCAAATAAGTTTGAGAATGAATGTG |
| DNMT1-site3_off3_Adaptor_R | GTGACTGGAGTTCAGACGTGTGCTCTTCCGATCT<br>AGAGCTGAAAGTTTAGCATGGAGG     |
| HEK site4_on_Adaptor_F     | ACACTCTTTCCCTACACGACGCTCTTCCGATCT<br>AGAGGGTCCAAAGCAGGATGACAG      |
| HEK site4_on_Adaptor_R     | GTGACTGGAGTTCAGACGTGTGCTCTTCCGATCT<br>CTTTCAACCCGAACGGAGACACACA    |
| HEK site4_off1_Adaptor_F   | ACACTCTTTCCCTACACGACGCTCTTCCGATCT<br>TTCTGAGACTCATAGCTGGGGCTGAA    |
| HEK site4_off1_Adaptor_R   | GTGACTGGAGTTCAGACGTGTGCTCTTCCGATCT<br>CCTCGGAGTCCTCAAGTATCACTGTCC  |
| HEK site4_off2_Adaptor_F   | ACACTCTTTCCCTACACGACGCTCTTCCGATCT<br>TCATTCCACCAGAACTCAGCCCAG      |
| HEK site4_off2_Adaptor_R   | GTGACTGGAGTTCAGACGTGTGCTCTTCCGATCT<br>TGTTTCCACCCTCGGTTCTCCACAA    |
| HEK site4_off3_Adaptor_F   | ACACTCTTTCCCTACACGACGCTCTTCCGATCT<br>CGGTCTTATTCTCTATGAGGGTCAGTCTC |
| HEK site4_off3_Adaptor_R   | GTGACTGGAGTTCAGACGTGTGCTCTTCCGATCT<br>CAGCTCAGCCACTGTAAAGCTCTT     |
| HEK site4_off4_Adaptor_F   | ACACTCTTTCCCTACACGACGCTCTTCCGATCT<br>GCAACTCTACAGGCTGAGTTCTTTCTT   |

|                                     |                                                                      |
|-------------------------------------|----------------------------------------------------------------------|
| HEK site4_off4_Adaptor_R            | GTGACTGGAGTTCAGACGTGTGCTCTTCCGATCT<br>TTAGATCAAGGAAGAACGTTTTCCATTACC |
| HEK site4_off5_Adaptor_F            | ACACTCTTTCCCTACACGACGCTCTTCCGATCT<br>CCTGTGTTCTGACGTCGTTTCAGATG      |
| HEK site4_off5_Adaptor_R            | GTGACTGGAGTTCAGACGTGTGCTCTTCCGATCT<br>GTCACGTGCACCATCCTCGTAGAGGA     |
| HEK site4_off6_Adaptor_F            | ACACTCTTTCCCTACACGACGCTCTTCCGATCT<br>AGAGGCTCTAATCAAAGAGCAAGAATTTG   |
| HEK site4_off6_Adaptor_R            | GTGACTGGAGTTCAGACGTGTGCTCTTCCGATCT<br>GGCTCTCCAAAGAACTTGATGTTG       |
| RNF2_on_Adaptor_F                   | ACACTCTTTCCCTACACGACGCTCTTCCGATCT<br>CTAAAAATGTATCCCAGTTTACACGTCTCA  |
| RNF2_on_Adaptor_R                   | GTGACTGGAGTTCAGACGTGTGCTCTTCCGATCT<br>AGCACTTCCCTTCCAAATACTAAAATTGTT |
| RNF2_off1_Adaptor_F                 | ACACTCTTTCCCTACACGACGCTCTTCCGATCT<br>AGACATCATCATGATAAATCTATTTGGTCT  |
| RNF2_off1_Adaptor_R                 | GTGACTGGAGTTCAGACGTGTGCTCTTCCGATCT<br>ATATTTTAAGCTAGAATGTGTTTGTGACA  |
| RNF2_off2_Adaptor_F                 | ACACTCTTTCCCTACACGACGCTCTTCCGATCT<br>GGTTTTTGCATTACTTGGGAAGCTAGTG    |
| RNF2_off2_Adaptor_R                 | GTGACTGGAGTTCAGACGTGTGCTCTTCCGATCT<br>AGGGAAAGTTATATGCAGCCATTGTG     |
| RNF2_off3_Adaptor_F                 | ACACTCTTTCCCTACACGACGCTCTTCCGATCT<br>AGTGTGGGATAATGCTGGGGTG          |
| RNF2_off3_Adaptor_R                 | GTGACTGGAGTTCAGACGTGTGCTCTTCCGATCT<br>CAGCGTGTTCTTATGACTATTAGCAC     |
| ZNF609 (Spacer 8A)_Adaptor_F        | ACACTCTTTCCCTACACGACGCTCTTCCGATCT<br>TGAAGCCCAGCAAGGACCGAACA         |
| ZNF609 (Spacer 8A)_Adaptor_R        | GTGACTGGAGTTCAGACGTGTGCTCTTCCGATCT<br>GCATCGTGAACATTTTTGTGTCAATTAGC  |
| RP11-77l22.4 (Spacer 15A)_Adaptor_F | ACACTCTTTCCCTACACGACGCTCTTCCGATCT<br>CAATATTCATGCCTTCTTTCACCTTGCC    |
| RP11-77l22.4 (Spacer 15A)_Adaptor_R | GTGACTGGAGTTCAGACGTGTGCTCTTCCGATCT<br>ACCTTTGGTAGTTTCCATCTATGTCGAG   |

**Supplementary Table 4. Comparative analysis of the CRISPR amplification method and a conventional method (GUIDE-seq) for the detection of intracellular off-target mutations induced by CRISPR-Cas12a (Cpf1).** PAM sequences(TTTN) of the AsCas12a effector are shown in blue and mismatched sequence to each on-target sites are shown in red respectively. (O) indicates detection, (X) indicates no detection and a question mark (?) indicates an ambiguous detection (indel frequency (%) below or near the detection limit =0.5%) with applied methods. NGS: finally confirmed by next generation sequencing. Yellow mark indicates the mutant DNA

detection with CRISPR amplification methods not by conventional NGS methods.

| Target sequence<br>( <i>RPL32P3</i> )                                  | GUIDE-<br>seq <sup>1</sup><br>(Reported<br>data) | Targeted<br>amplicon<br>sequencing<br>(NGS,<br>HEK293FT) | CRISPR<br>enrichment<br>(NGS,<br>HEK293FT) | CRISPR<br>enrichment<br>(NGS,<br>U2OS) |
|------------------------------------------------------------------------|--------------------------------------------------|----------------------------------------------------------|--------------------------------------------|----------------------------------------|
| <b><i>RPL32P3</i>-on target</b><br>(TTTGGGGTGATCAGACCCAA<br>CAGCAGG)   | O                                                | O                                                        | O                                          | O                                      |
| <b><i>RPL32P3</i>-off target1</b><br>(TTTGGGGTGATCAGACCCAA<br>CAcCAGG) | O                                                | O                                                        | O                                          | O                                      |
| <b><i>RPL32P3</i>-off target2</b><br>(TTTGGGGTGATCAGACCCAA<br>CAcCAGG) | O                                                | O                                                        | O                                          | O                                      |
| <b><i>RPL32P3</i>-off target3</b><br>(TTTGGGGTGATCAGACCCAA<br>CAcCAGG) | O                                                | O                                                        | O                                          | O                                      |
| <b><i>RPL32P3</i>-off target4</b><br>(TTTGGGGTGATCAGgCCCAA<br>CAcCAGG) | O                                                | O                                                        | O                                          | O                                      |
| <b><i>RPL32P3</i>-off target5</b><br>(TTTGGGGTGATCAGACCCAA<br>CccCAGG) | O                                                | ?                                                        | O                                          | O                                      |
| <b><i>RPL32P3</i>-off target6</b><br>(TTTGGGGTGATCAGACCtAA<br>CAcTAGG) | X                                                | X                                                        | X                                          | X                                      |

|                                                                   |   |   |   |   |
|-------------------------------------------------------------------|---|---|---|---|
| <b>RPL32P3-off target7</b><br>(TTTG GGGTGATCcaACCCAA<br>CAcCAGG)  | X | X | X | X |
| <b>RPL32P3-off target8</b><br>(TTTG GGGTGgcCAGACCCAA<br>CAcCAGG)  | X | X | X | X |
| <b>RPL32P3-off target9</b><br>(TTTG GGGTGgaCAGACCCAA<br>CAcCAGG)  | X | X | X | X |
| <b>RPL32P3-off target10</b><br>(TTTT GGGTGtTCAGgaCCAAC<br>AaCAGG) | X | X | X | X |

**Supplementary Table 5. Comparative analysis of the CRISPR amplification method and a conventional method (targeted amplicon sequencing) for the detection of intracellular off-target mutations induced by CRISPR-Cas12a.** PAM sequences (TTTN) of the AsCas12a effector are shown in blue and mismatched sequence to each on-target sites are shown in red respectively. Guide-seq numbers were presented according to the reference paper. (O) indicates detection and (X) indicates no detection with applied methods. NGS: finally confirmed by next generation sequencing.

| Target sequence<br>(DNMT1-site3)                               | GUIDE-seq read<br>counts <sup>1</sup><br>(Reported data) | CRISPR enrichment<br>(NGS, HEK293FT) |
|----------------------------------------------------------------|----------------------------------------------------------|--------------------------------------|
| <b>DNMT1-site3-on target</b><br>(TTTC CTGATGGTCCATGTCTGTTACTC) | 783                                                      | O                                    |

|                                                                         |      |   |
|-------------------------------------------------------------------------|------|---|
| <b><i>DNMT1</i>-site3-off target1</b><br>(TTTC CTGATGGTCCAcGcCTGTTAaca) | 0    | X |
| <b><i>DNMT1</i>-site3-off target2</b><br>(TTTC CTGATGGTCCATacCTGTTAaca) | 2    | O |
| <b><i>DNMT1</i>-site3-off target3</b><br>(TTTC CTGATGGTCCATGTCTGaattag) | 1174 | O |

**Supplementary Table 6. Comparative analysis of the CRISPR amplification method and a conventional method (targeted amplicon sequencing) for the detection of intracellular off-target mutations induced by CRISPR-Cas9.** PAM sequences (NGG) of the SpCas9 effector are shown in blue and mismatched sequence to each on-target sites are shown in red respectively. (O) indicates detection and (X) indicates no detection with applied methods. NGS: finally confirmed by next generation sequencing. Yellow mark indicates the mutant DNA detection with CRISPR amplification methods not by conventional NGS methods.

| Target sequence<br>( <i>FAT3</i> )                           | Targeted<br>amplicon<br>sequencing<br>(NGS, HEK293FT) | CRISPR enrichment<br>(NGS, HEK293FT) |
|--------------------------------------------------------------|-------------------------------------------------------|--------------------------------------|
| <b><i>FAT3</i>-on target</b><br>(GAGCTGCTTAAGCATTTCAA GGG)   | O                                                     | O                                    |
| <b><i>FAT3</i>-off target2</b><br>(GcAAACAAAaCagAGACTGA AGG) | X                                                     | X                                    |
| <b><i>FAT3</i>-off target3</b><br>(GTAAACAAcaCagAGACTGA AGG) | X                                                     | O                                    |

|                                                                                  |          |          |
|----------------------------------------------------------------------------------|----------|----------|
| <b>FAT3-off target4</b><br>(GgAAACA <b>g</b> AGCATAGAA <b>a</b> TGA <b>TGG</b> ) | <b>X</b> | <b>X</b> |
|----------------------------------------------------------------------------------|----------|----------|

**Supplementary Table 7. Comparative analysis of the CRISPR amplification method and a conventional method (targeted amplicon sequencing, NGS) for the detection of intracellular off-target mutations induced by CRISPR-Cas9.** PAM sequences (NGG) of the SpCas9 effector are shown in blue and mismatched sequence to each on-target sites are shown in red respectively. Guide-seq numbers were presented according to the reference paper. (O) indicates detection and (X) indicates no detection with applied methods. Question mark (?) indicates an ambiguous detection (indel frequency (%) below or near the detection limit =0.5%). NGS: finally confirmed by next generation sequencing. Yellow mark indicates the mutant DNA detection with CRISPR amplification methods not by conventional NGS methods.

| <b>Target sequence<br/>(HEK site4)</b>                                                        | <b>GUIDE-seq read<br/>counts<sup>2</sup><br/>(Reported data)</b> | <b>Targeted<br/>amplicon<br/>sequencing<br/>(NGS,<br/>HEK293FT)</b> | <b>CRISPR<br/>enrichment<br/>(NGS, HEK293FT)</b> |
|-----------------------------------------------------------------------------------------------|------------------------------------------------------------------|---------------------------------------------------------------------|--------------------------------------------------|
| <b>HEK site4 on-target</b><br>(GGCACTGCGGCTGGAGGTGG<br><b>GGG</b> )                           | <b>1,054</b>                                                     | <b>O</b>                                                            | <b>O</b>                                         |
| <b>HEK site4 off1-target</b><br>(tGCACTGCGGC <b>c</b> GGAGG <b>a</b> GG <b>TGG</b> )          | <b>2,475</b>                                                     | <b>O</b>                                                            | <b>O</b>                                         |
| <b>HEK site4 off2-target</b><br>(GGCA <b>tca</b> CGGCTGGAGGTGG <b>AGG</b> )                   | <b>1,097</b>                                                     | <b>?</b>                                                            | <b>O</b>                                         |
| <b>HEK site4 off3-target</b><br>( <b>a</b> GCA <b>g</b> TGCGGCT <b>a</b> GAGGTGG <b>TGG</b> ) | <b>981</b>                                                       | <b>O</b>                                                            | <b>O</b>                                         |

|                                                                                      |    |   |   |
|--------------------------------------------------------------------------------------|----|---|---|
| <b>HEK site4 off4-target</b><br>(GGCACTG <b>aGaaa</b> GGAGGTGG<br><b>AGG</b> )       | 13 | X | X |
| <b>HEK site4 off5-target</b><br>(GG <b>gca</b> TGCGGCTGGA <b>a</b> GTGG <b>TGG</b> ) | 3  | ? | O |
| <b>HEK site4 off6-target</b><br>(GCAC <b>aGg</b> GGCTGGAGGTGG <b>GGC</b> )           | 3  | X | X |

**Supplementary Table 8. Comparative analysis of the CRISPR amplification method and a conventional method (targeted amplicon sequencing, NGS) for the detection of intracellular off-target mutations induced by CRISPR-Cas9.** PAM sequences (NGG) of the SpCas9 effector are shown in blue and mismatched sequence to each on-target sites are shown in red respectively. Guide-seq numbers were presented according to the reference paper. (O) indicates detection and (X) indicates no detection with applied methods. NGS: finally confirmed by next generation sequencing.

| Target sequence<br>( <i>RNF2</i> )                                                             | GUIDE-seq read<br>counts <sup>2</sup><br>(Reported data) | Targeted<br>amplicon<br>sequencing<br>(NGS,<br>HEK293FT) | CRISPR<br>enrichment<br>(NGS, HEK293FT) |
|------------------------------------------------------------------------------------------------|----------------------------------------------------------|----------------------------------------------------------|-----------------------------------------|
| <b><i>RNF2</i> on-target</b><br>(GTCATCTTAGTCATTACCTG <b>AGG</b> )                             | 6,643                                                    | O                                                        | O                                       |
| <b><i>RNF2</i> off1-target</b><br>(G <b>g</b> tATCT <b>a</b> AGTCATTACCTG <b>TGG</b> )         | 0                                                        | X                                                        | X                                       |
| <b><i>RNF2</i> off2target</b><br>(GT <b>a</b> ATCT <b>g</b> AGTCATT <b>t</b> CCTG <b>GGG</b> ) | 0                                                        | X                                                        | X                                       |

|                                                                                |          |          |          |
|--------------------------------------------------------------------------------|----------|----------|----------|
| <b>RNF2 off3target</b><br>(GTCATC <b>c</b> TAGT <b>gc</b> TTACCTG <b>AGG</b> ) | <b>0</b> | <b>X</b> | <b>X</b> |
|--------------------------------------------------------------------------------|----------|----------|----------|

**Supplementary Table 9. Comparative analysis of the CRISPR amplification method and a conventional method (targeted amplicon sequencing) for the detection of intracellular off-target mutations induced by ABE.** PAM sequences (NGG) of the adenine base editor are shown in blue and mismatched sequence to each on-target sites are shown in red respectively. (O) indicates detection and (X) indicates no detection with applied methods. NGS: finally confirmed by next generation sequencing. Yellow mark indicates the mutant DNA detection with CRISPR amplification methods not by conventional NGS methods.

| <b>Target sequence<br/>(PSMB2)</b>                                                        | <b>Targeted<br/>amplicon<br/>sequencing<br/>(NGS, HEK293FT)</b> | <b>CRISPR enrichment<br/>(NGS, HEK293FT)</b> |
|-------------------------------------------------------------------------------------------|-----------------------------------------------------------------|----------------------------------------------|
| <b>PSMB2-on target</b><br>(GTAAACAAAGCATAGACTGA <b>GGG</b> )                              | <b>O</b>                                                        | <b>O</b>                                     |
| <b>PSMB2-off target2</b><br>(G <b>c</b> AAACAAA <b>a</b> C <b>Ag</b> AGACTGA <b>AGG</b> ) | <b>X</b>                                                        | <b>O</b>                                     |
| <b>PSMB2-off target3</b><br>(GTAAACAA <b>ca</b> C <b>Ag</b> AGACTGA <b>AGG</b> )          | <b>X</b>                                                        | <b>O</b>                                     |
| <b>PSMB2-off target4</b><br>(G <b>g</b> AAAC <b>Ag</b> AGCATAGA <b>a</b> TGA <b>TGG</b> ) | <b>X</b>                                                        | <b>O</b>                                     |

Supplementary Figures

Supplementary Fig.1

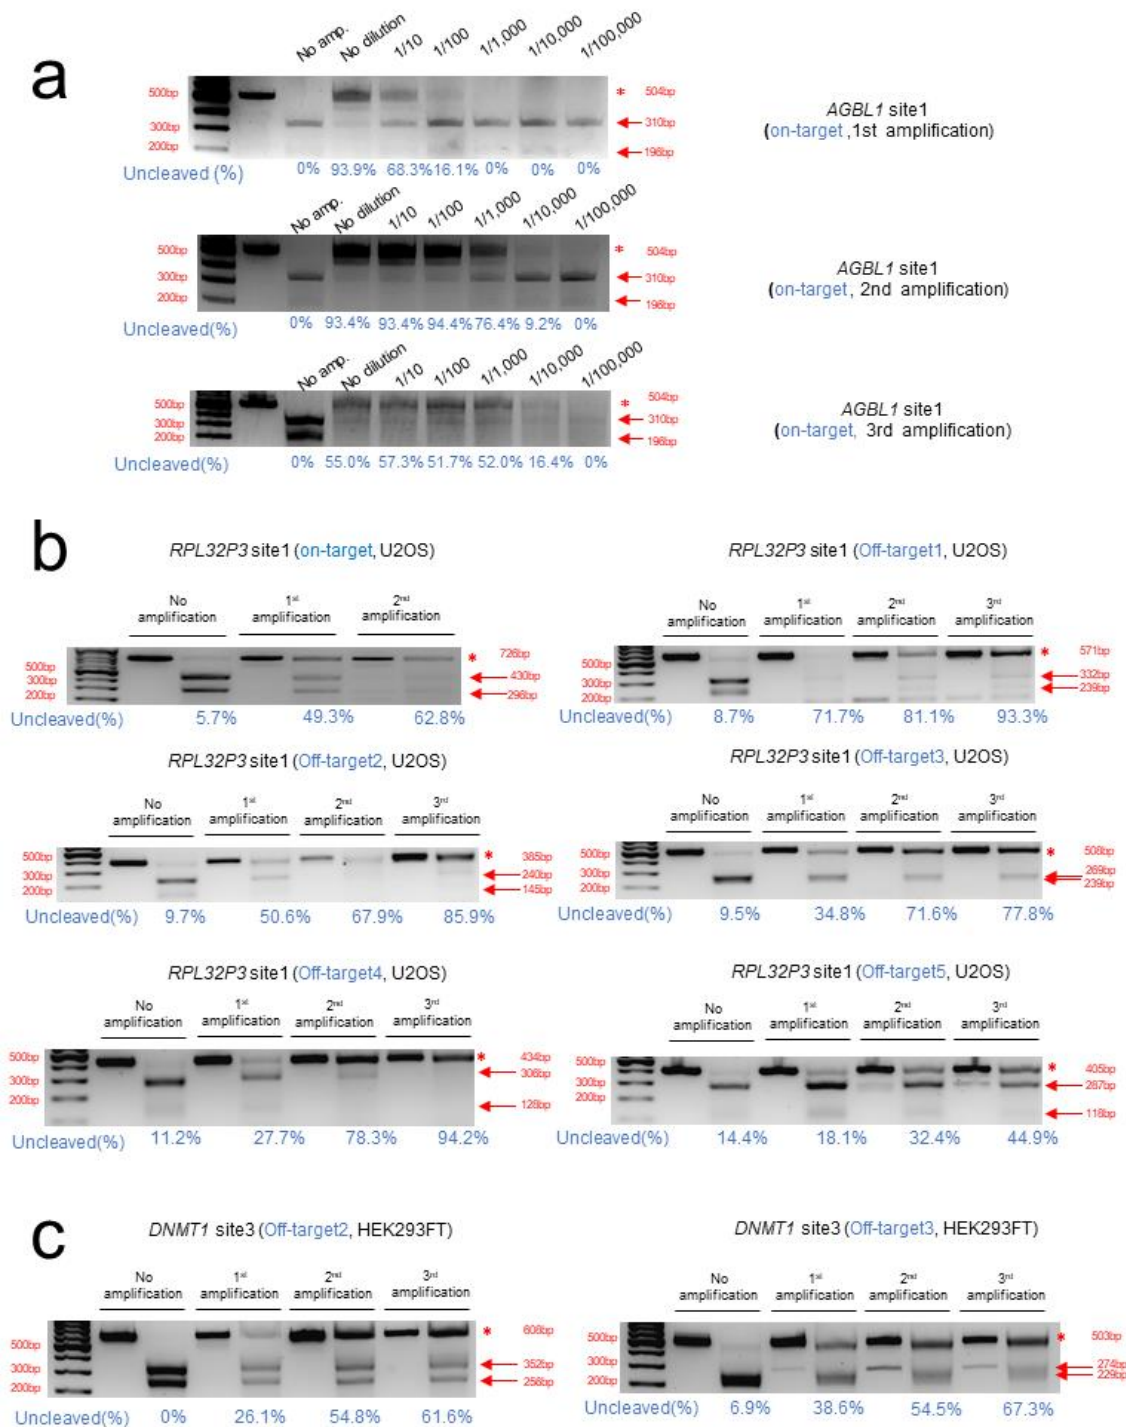

**Supplementary Figure 1. Genotyping of the Cas12a induced mutant DNA enrichment with CRISPR amplification.** **(a)** Relatively compare the results of serially diluted (from 1X to 1/ 100000X) each genomic DNA sample with mutations induced by Cas12a. Relative mutant DNA frequency (%) at *AGBL1* locus was calculated by cleaving DNA amplicons with optimally designed crRNA for Cas12a. The cleaved amplicons were separated by 2% agarose gel. **(b)** Relative mutant DNA frequency (%) for predicted off-target sites of *RPL32P3* site in genomic DNA from U2OS cells. **(c)** Relative mutant DNA frequency (%) for predicted off-target sites of *DNMT1* in genomic DNA from U2OS cells. Uncleaved DNA fractions are indicated by asterisk and cleaved DNA fractions are indicated by red arrows, respectively. Uncleaved mutant DNA frequency (%) was calculated by intensity ratio of band patterns (uncleaved fraction (%) / cleaved fraction (%) + uncleaved fraction (%)). Representative gel image was shown from two (N=2) independent experiments. Source data are provided as a Source Data file.

Supplementary Fig.2

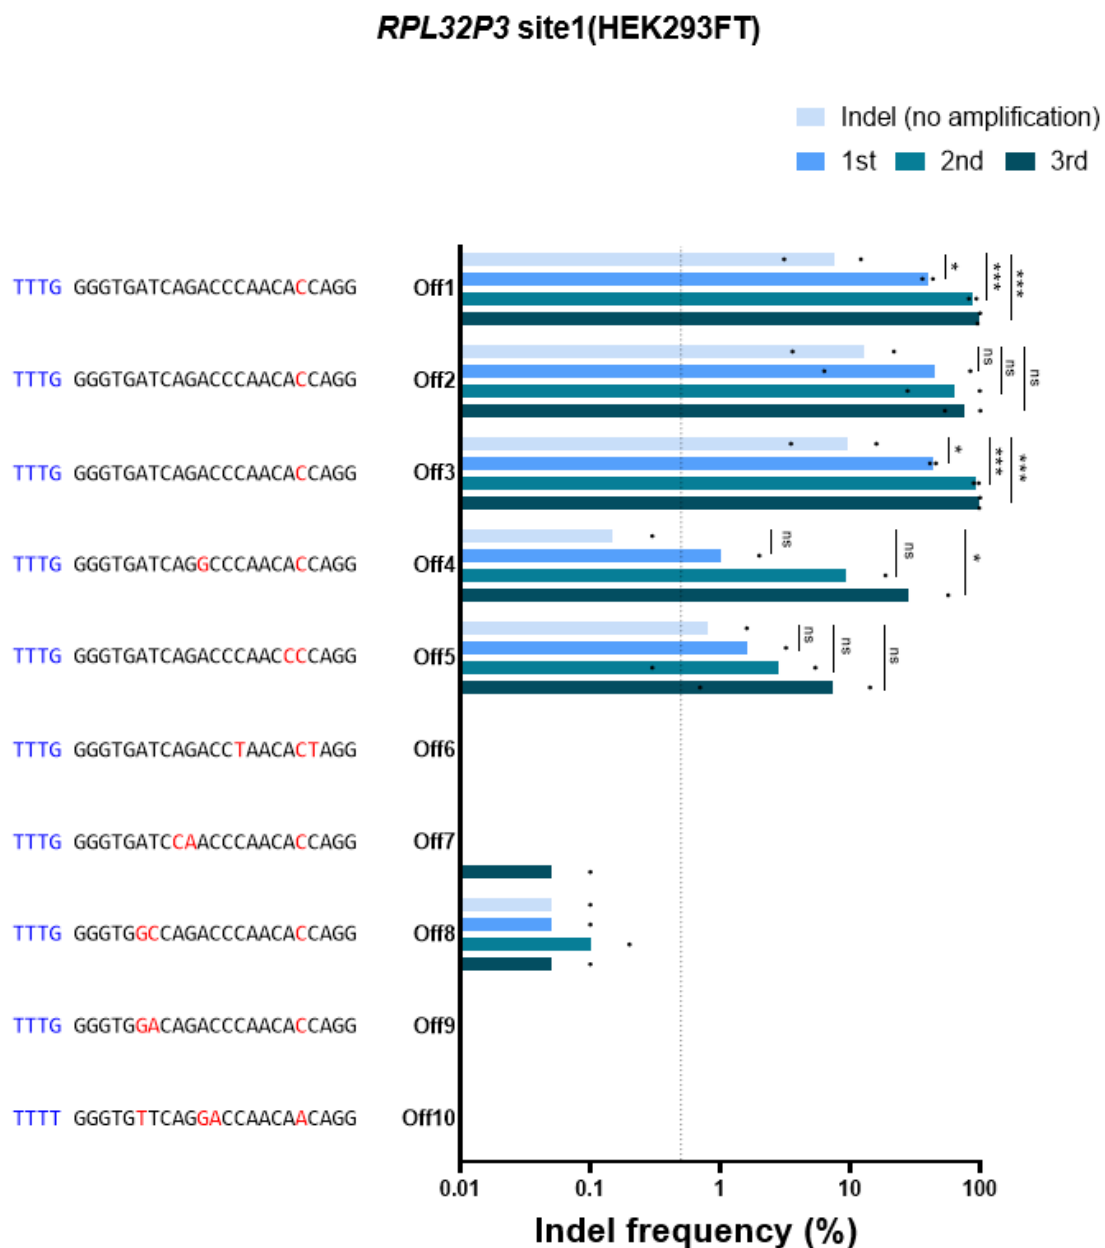

**Supplementary Figure 2. Detection of the intracellular off-target mutation induced by CRISPR-Cas12a (Cpf1) by using CRISPR amplification.** Detection of off-target mutations for the target sequence (*RPL32P3* locus) generated by CRISPR-Cas12a effector in HEK293FT cells. PCR amplicons were generated for 10 off-target sequences same with (Fig. 2) and indel frequency (%) was analyzed by next-generation sequencing after multiple CRISPR amplification. The Y axis represents the amplified target and off-target sequences (The PAM sequence and mismatch to wild-

type reference in protospacer is shown in blue and red color, respectively), and the X axis represents the frequency (%) of indels on a log scale. The dashed line indicates the NGS detection limit ( $=0.5\%$ ). Each amplification stage for mutant DNA enrichment is shown in light blue (no amplification), blue (1<sup>st</sup> CRISPR amplification), green (2<sup>nd</sup> CRISPR amplification) and dark green (3<sup>rd</sup> CRISPR amplification). Data are shown as mean from two (N=2) independent experiments. *P*-values are calculated using a one-way ANOVA, Tukey's test (ns: not significant,  $P^*=0.0332$ ,  $P^{**}=0.0021$ ,  $P^{***}=0.0002$ ,  $P^{****}=0.0001$ ).

Supplementary Fig.3

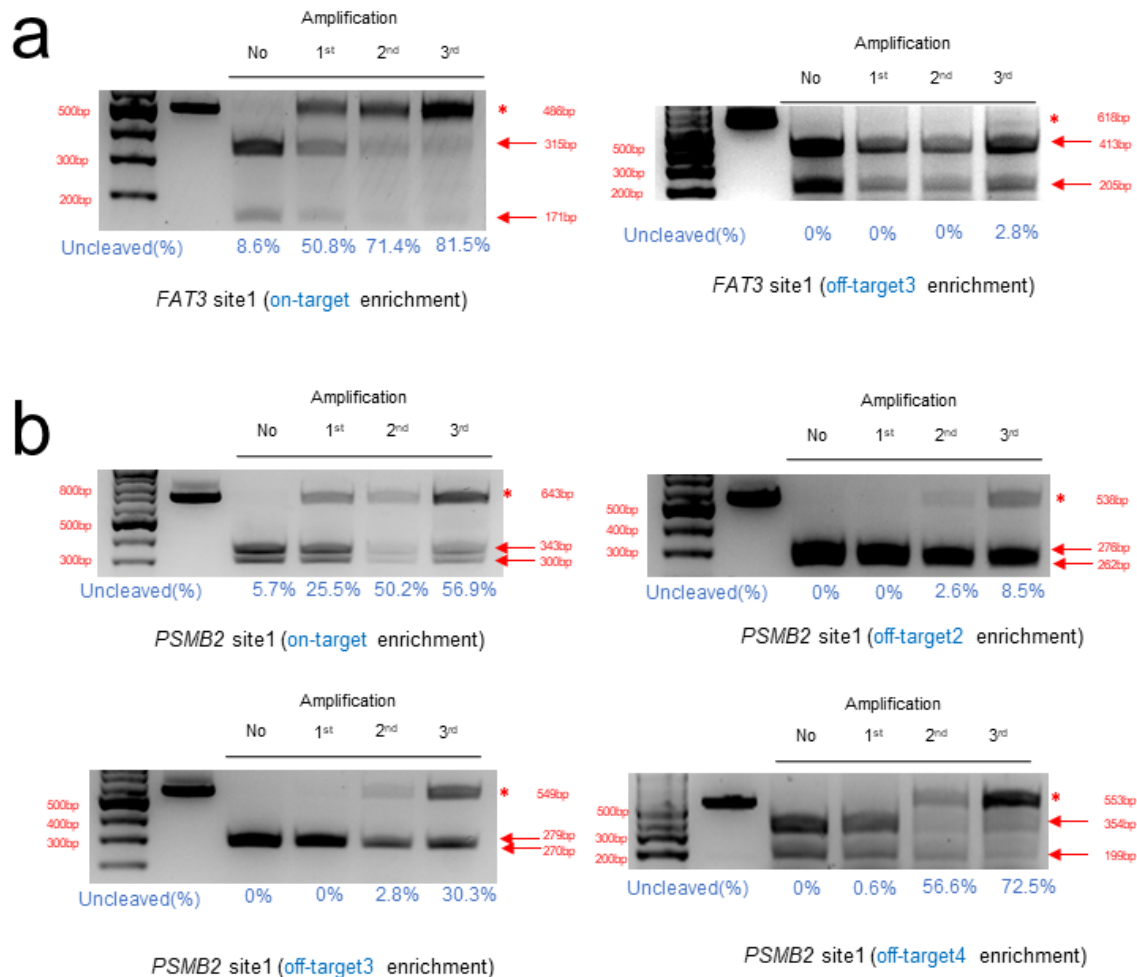

**Supplementary Figure 3. Genotyping of the CRISPR amplification of intracellular off-target mutations induced by CRISPR-Cas9 and adenine base editor (ABE).** (a) The relative mutant DNA frequency (%) for target and predicted Cas9 off-target sites of *FAT3* sequence in genomic DNA from HEK293FT cell is calculated by cleavage

and separation of PCR amplicons on 2% agarose gel. **(b)** The relative single-base substituted DNA frequency (%) for target and predicted base editor off-target sites of *PSMB2* sequence in genomic DNA from HEK293FT cell is calculated by cleavage and separation of PCR amplicons on 2% agarose gel. Uncleaved DNA fractions are indicated by asterisk and cleaved DNA fractions are indicated by red arrows. Uncleaved mutant DNA frequency (%) was calculated by intensity ratio of band patterns (uncleaved fraction (%) / cleaved fraction (%) + uncleaved fraction (%)). Representative gel image was shown from two (N=2) independent experiments. Source data are provided as a Source Data file.

Supplementary Fig.4

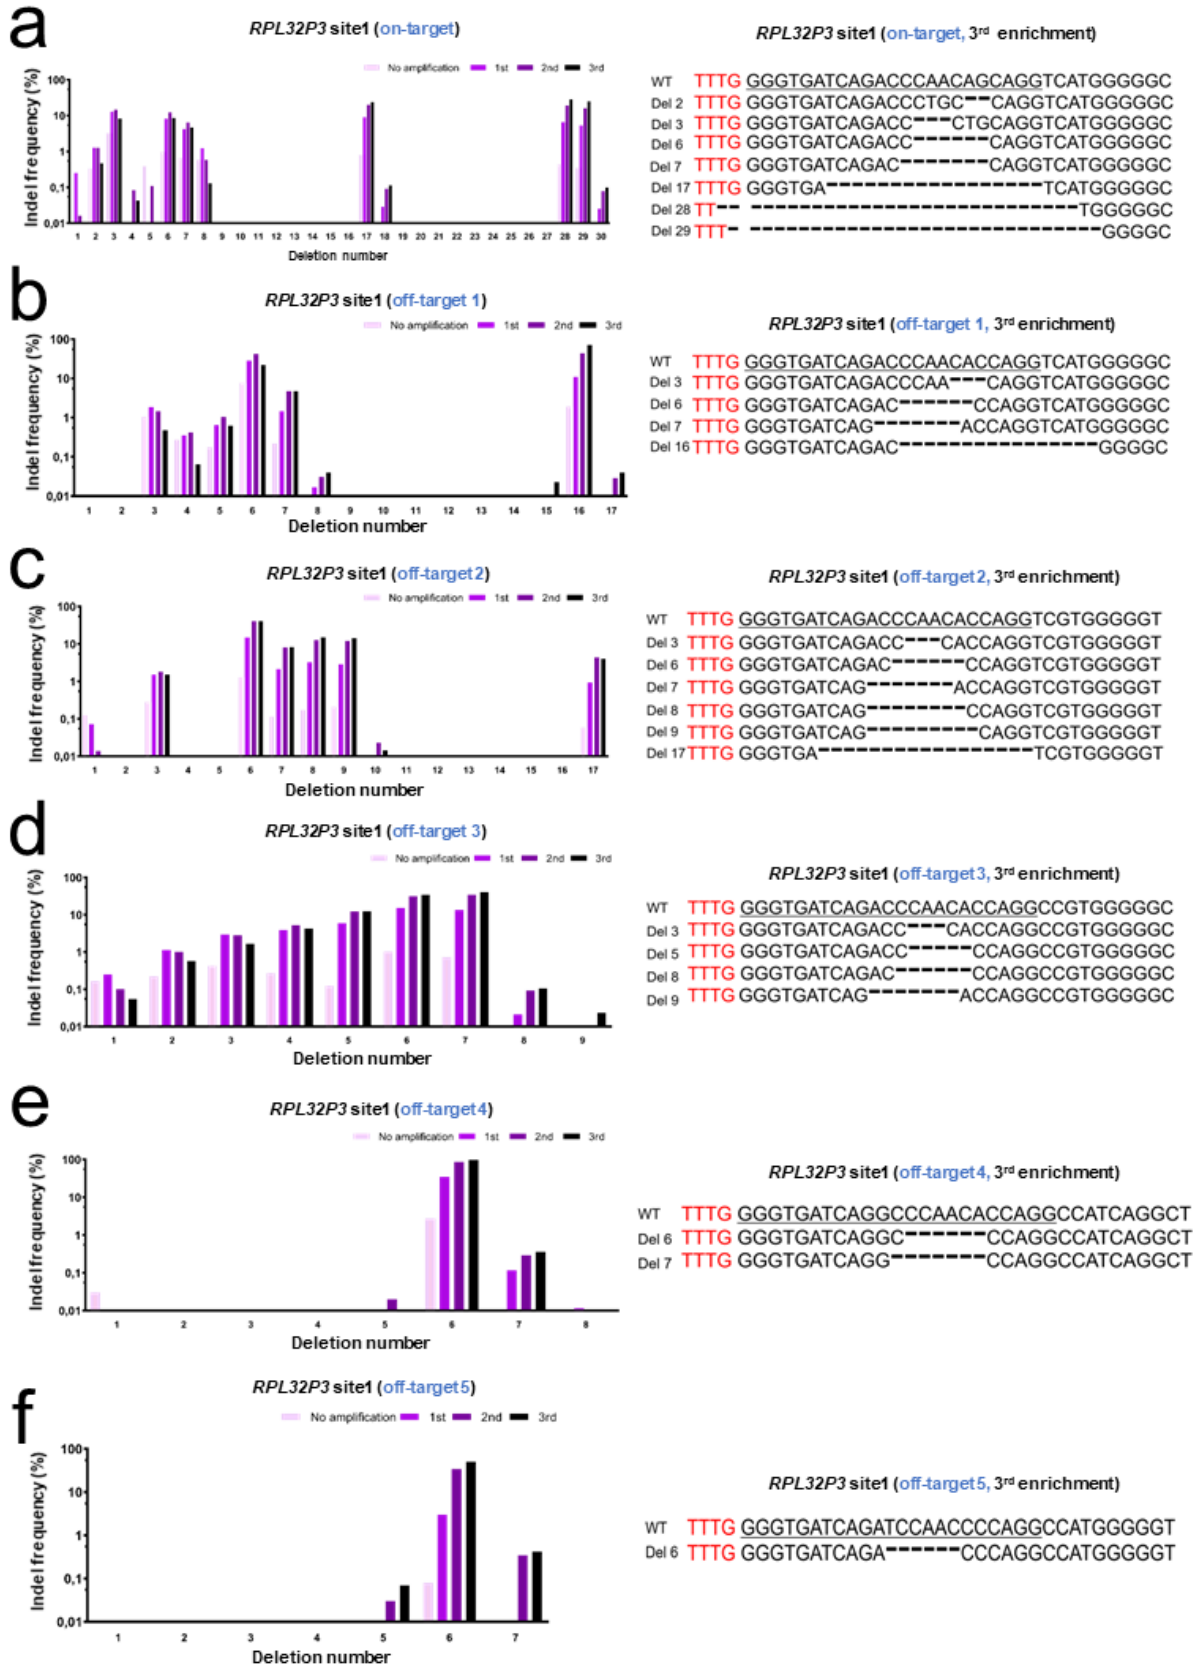

**Supplementary Figure 4. Enriched mutant DNA pattern induced by Cas12a at predicted off-target sites for *RPL32P3* target sequence.** NGS data analysis of AsCas12a induced indel patterns enriched by multiple round CRISPR amplification for **(a)** *RPL32P3* on-target site, **(b)** off-target site1, **(c)** off-target site2, **(d)** off-target site3, **(e)** off-target site4, and **(f)** off-target site5, respectively. Each amplification stage for mutant DNA enrichment is shown in pink (no amplification), light purple (1<sup>st</sup> CRISPR amplification), purple (2<sup>nd</sup> CRISPR amplification) and black (3<sup>rd</sup> CRISPR amplification).

Supplementary Fig.5

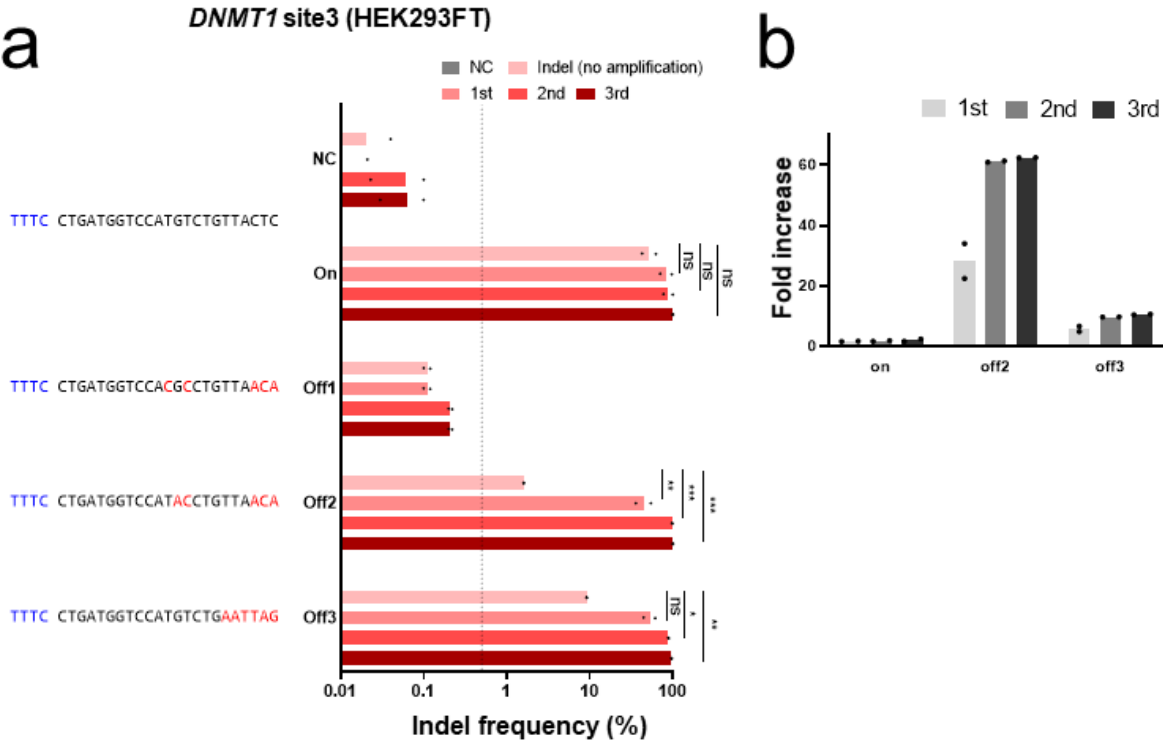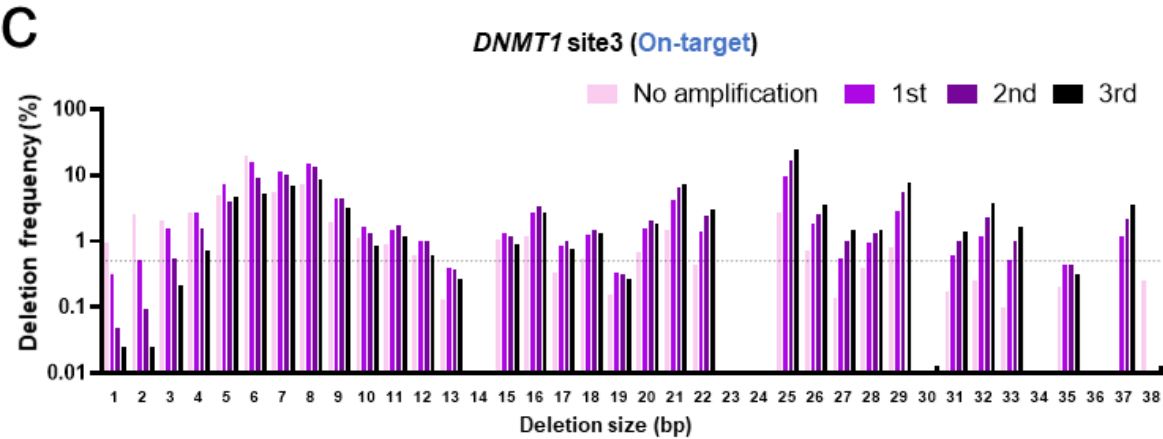

*DNMT1* site3 (On-target, 3<sup>rd</sup> enrichment)

|        |         |                                         |
|--------|---------|-----------------------------------------|
| WT     | ATGTTTC | CTGATGGTCCATGCTGTTACTCGCCTGTCAAGTGGCGT  |
| Del 5  | ATGTTTC | CTGATGGTCCATG-----TACTCGCCTGTCAAGTGGCGT |
| Del 6  | ATGTTTC | CTGATGGTCCATG-----ACTCGCCTGTCAAGTGGCGT  |
| Del 7  | ATGTTTC | CTGATGGTCCA-----TACTCGCCTGTCAAGTGGCGT   |
| Del 8  | ATGTTTC | CTGATGGTCCAT-----CTCGCCTGTCAAGTGGCGT    |
| Del 9  | ATGTTTC | CTGATGGTCCATG-----CGCCTGTCAAGTGGCGT     |
| Del 16 | ATGTTTC | CTGATGGT-----CCTGTCAAGTGGCGT            |
| Del 21 | ATGTTTC | CTGATG-----GTCAAGTGGCGT                 |
| Del 22 | ATGTTTC | CTGA-----TGTCAGTGGCGT                   |
| Del 25 | ATGTTT  | -----CCTGTCAAGTGGCGT                    |
| Del 26 | ATGTT   | -----CCTGTCAAGTGGCGT                    |
| Del 27 | ATGTTTC | CTGAT-----GTGGCGT                       |
| Del 28 | ATGTTTC | CTGATGGT-----CGT                        |
| Del 29 | ATGTTTC | CTGA-----TGGCGT                         |
| Del 31 | ATGTTTC | CTGATG-----GT                           |
| Del 32 | A-----  | -----TGTCAGTGGCGT                       |
| Del 33 | ATGT--- | -----AAGTGGCGT                          |
| Del 37 | ATGTTTC | C-----T                                 |

Supplementary Fig.5

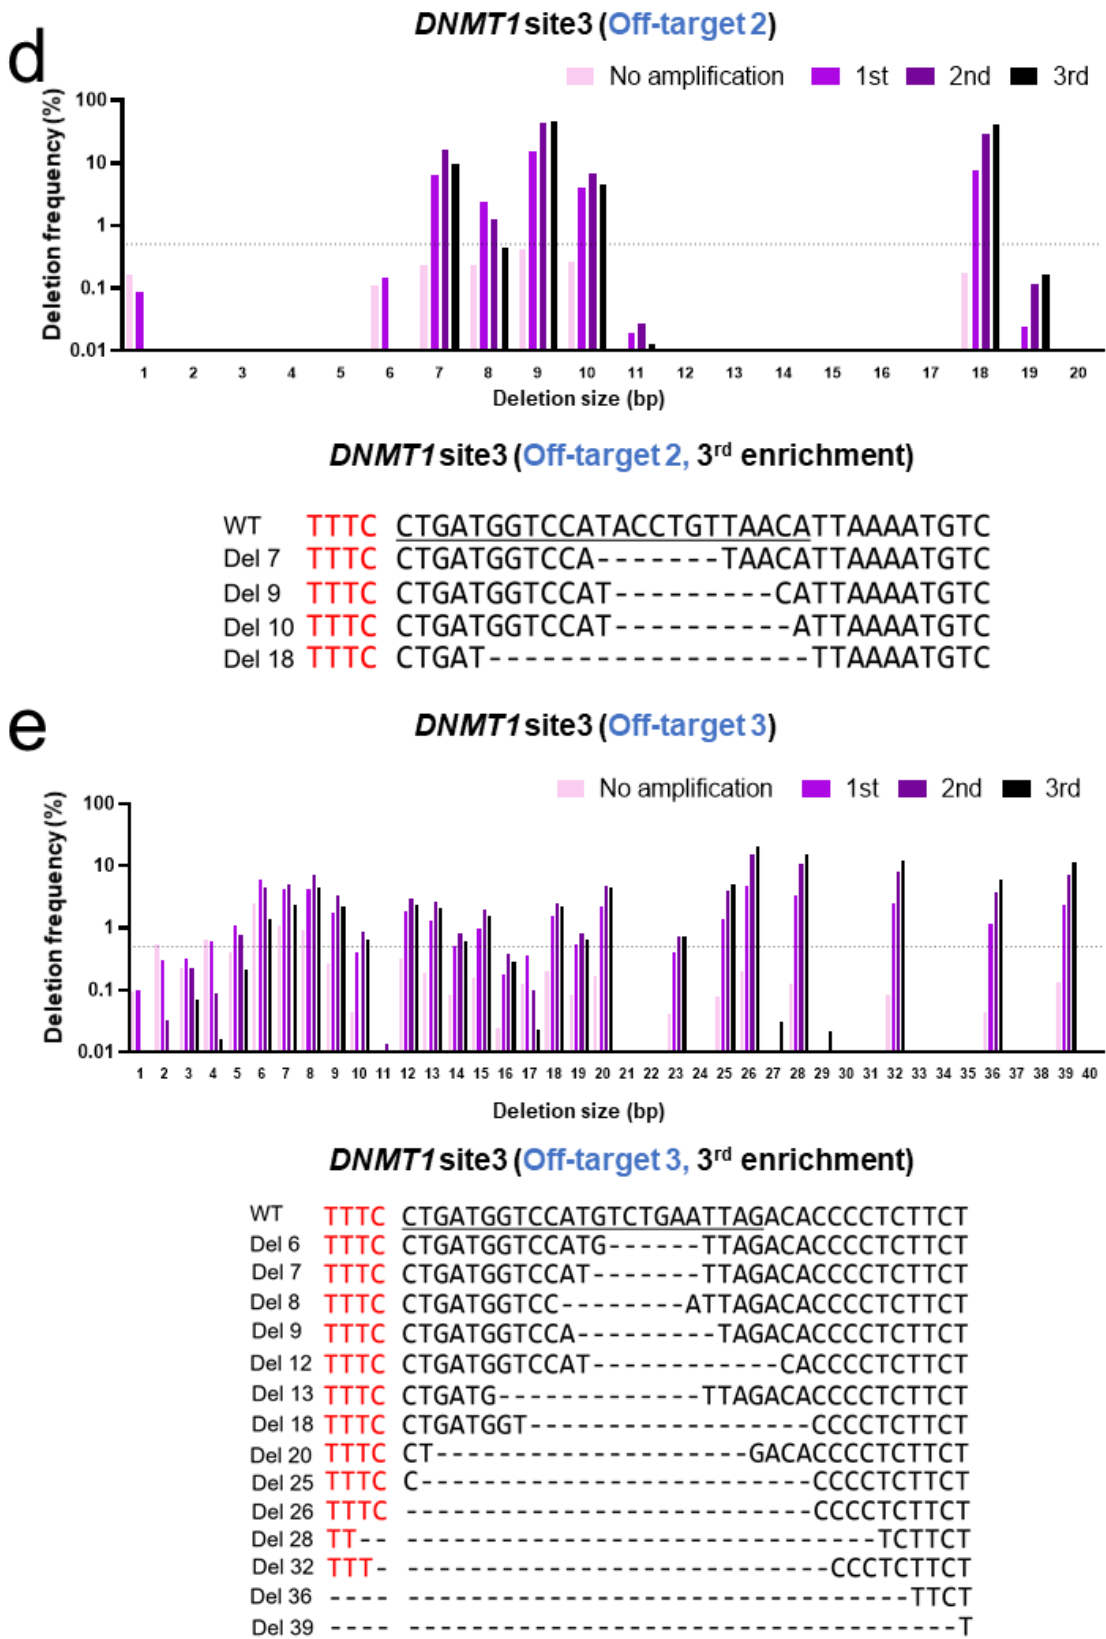

Supplementary Figure 5. Enriched mutant DNA pattern induced by Cas12a at

**predicted off-target sites for *DNMT1* target sequence.** (a) Detection of off-target mutations for the target sequence (*DNMT1*) generated by the CRISPR-Cas12a effector in HEK293FT cells. PCR amplicons were generated for on-target and three off-target sequences (The PAM sequence and mismatch to wild-type reference in protospacer is shown in blue and red color, respectively) predicted *in silico* and the indel frequency (%) was analyzed by NGS after sequential CRISPR amplifications. NC indicates a negative control for no Cas12a delivery into the cells. Each amplification stage for mutant DNA enrichment is shown in gray (NC), light pink (no amplification), pink (1<sup>st</sup> CRISPR amplification), red (2<sup>nd</sup> CRISPR amplification) and dark red (3<sup>rd</sup> CRISPR amplification). The dashed line indicates the NGS detection limit (=0.5%). Data are shown as mean from two (N=2) independent experiments. *P*-values are calculated using a one-way ANOVA, Tukey's test (ns: not significant, *P*\*=0.0332, *P*\*\*=0.0021, *P*\*\*\*=0.0002, *P*\*\*\*\*=0.0001). (b) Fold increases in *DNMT1* target and off-target mutant DNA after CRISPR amplification (N=2). (c-e) NGS analysis of AsCas12a induced indel patterns on *DNMT1*-site3 locus enriched by third round CRISPR amplification for (c) on-target, (d) off-target site2, (e) off-target site3, respectively. Each amplification stage for mutant DNA enrichment is shown in pink (no amplification), light purple (1<sup>st</sup> CRISPR amplification), purple (2<sup>nd</sup> CRISPR amplification) and black (3<sup>rd</sup> CRISPR amplification).

Supplementary Fig.6

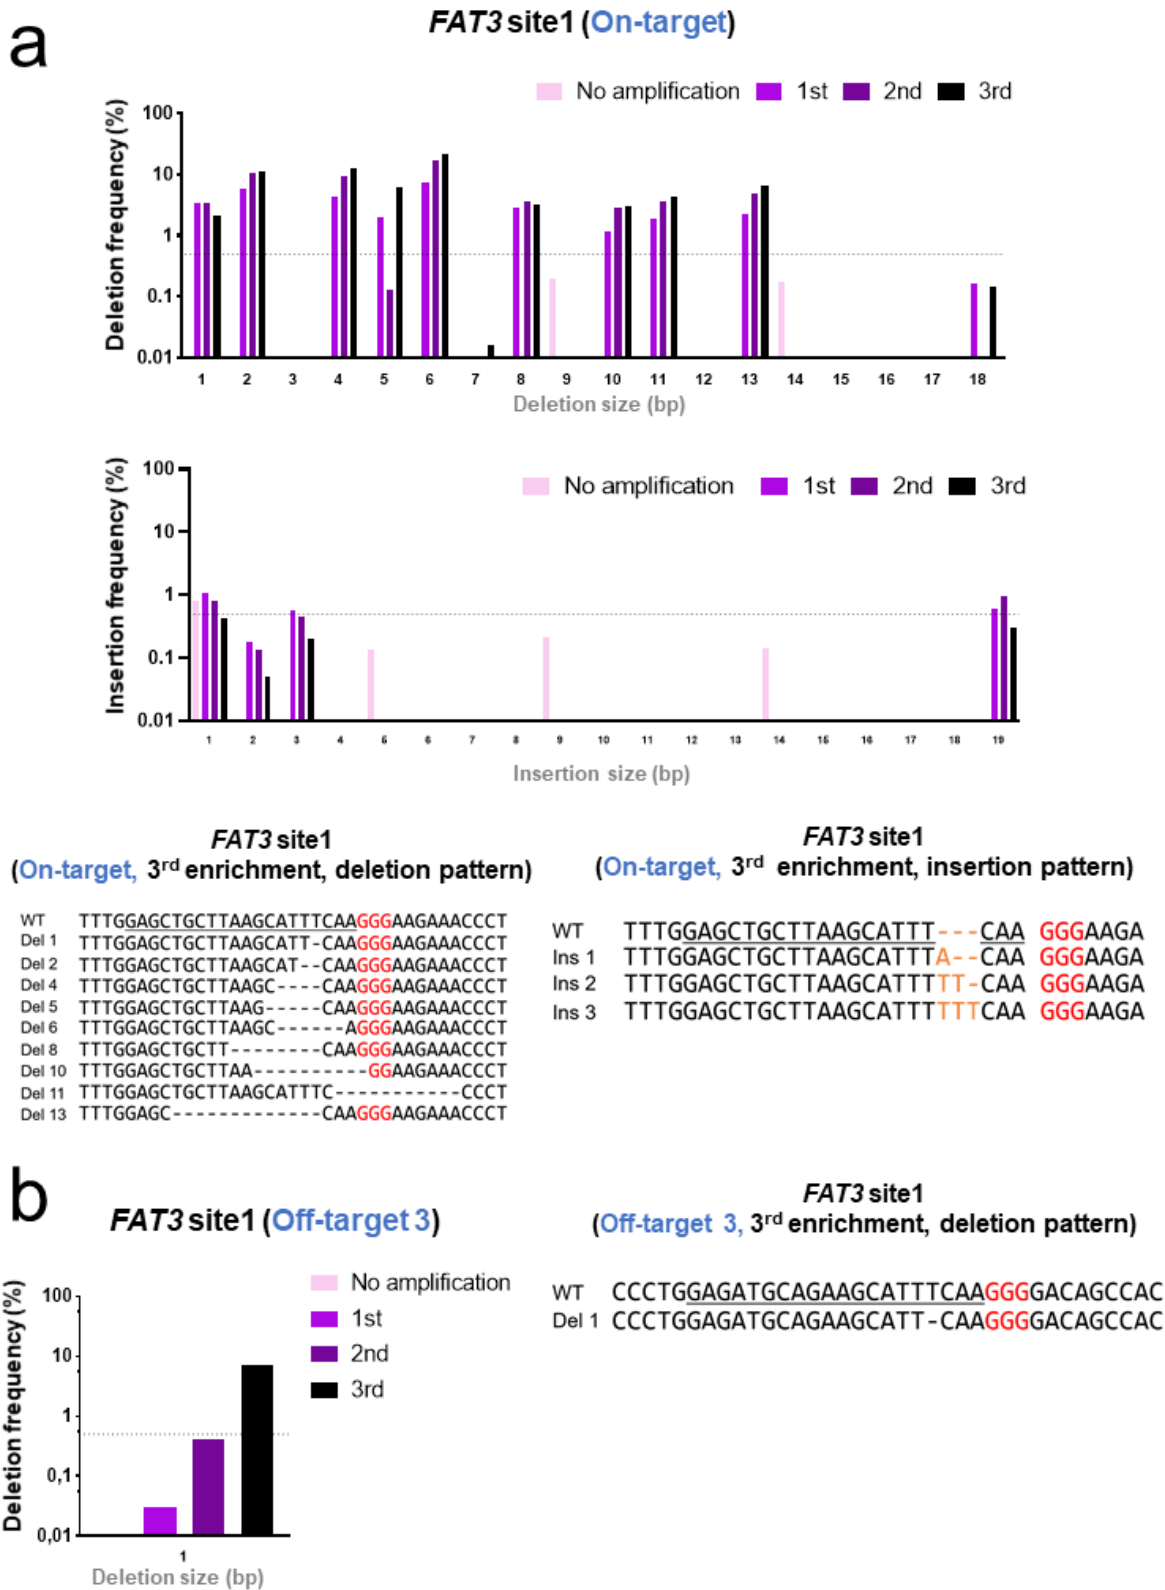

Supplementary Figure 6. Enriched mutant DNA pattern induced by Cas9 effector

**at predicted off-target sites for *FAT3* target sequence.** NGS analysis of SpCas9 induced indel patterns on *FAT3* locus enriched by third round CRISPR amplification for **(a)** on-target and **(b)** off-target site<sup>3</sup>. PAM sequence (NGG) for SpCas9 is shown in red color and inserted DNA bases are shown in orange color respectively. Each amplification stage for mutant DNA enrichment is shown in pink (no amplification, indel only), light purple (1<sup>st</sup> CRISPR amplification), purple (2<sup>nd</sup> CRISPR amplification) and black (3<sup>rd</sup> CRISPR amplification).

Supplementary Fig.7

a

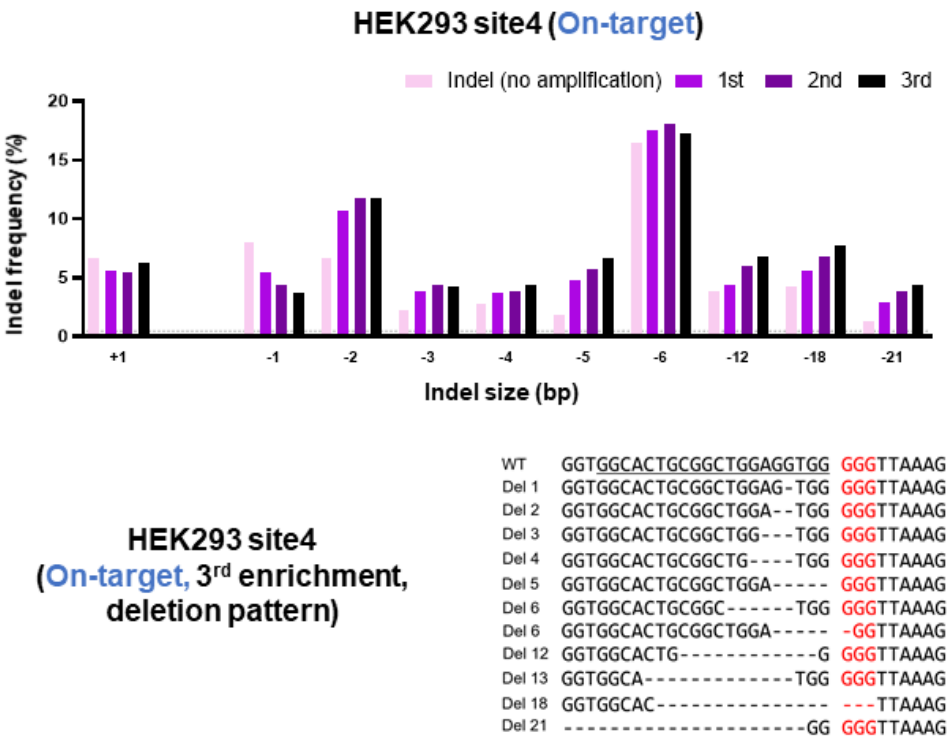

b

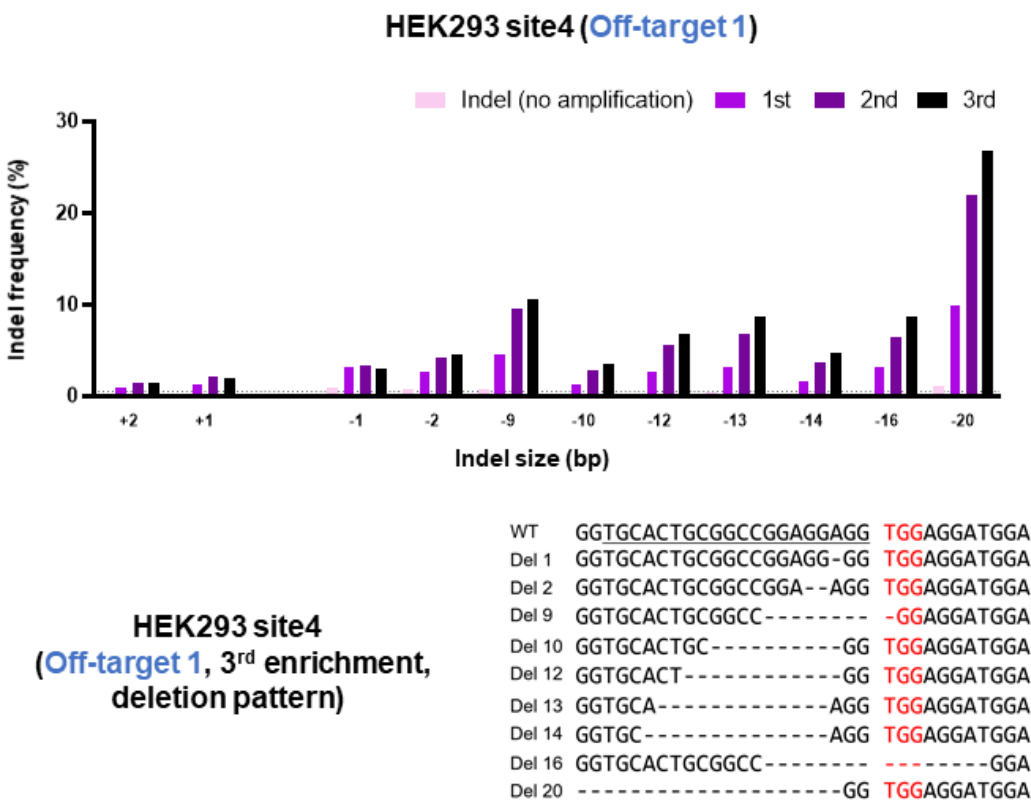

C

### HEK293 site4 (Off-target 2)

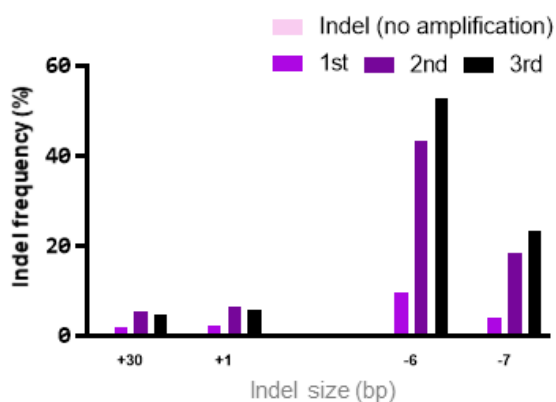

### HEK293 site4 (Off-target 2, 3<sup>rd</sup> enrichment, deletion pattern)

WT GGCATCACGGCTGGAGGTGG AGG  
 Del 6 GGCATCACGGC-----TGG AGG  
 Del 7 GGCATCAC-----GGTGG AGG

### HEK293 site4 (Off-target 2, 3<sup>rd</sup> enrichment, insertion pattern)

WT CAAGGCATCACGGCTGGAGG-----TGG AGG  
 Ins 1 CAAGGCATCACGGCTGGAGGA-----TGG AGG  
 Ins 30 CAAGGCATCACGGCTGGAGGGAACAAGTTGAAAGACCCAAGCAACCTGAATGG AGG

d

### HEK293 site4 (Off-target 3)

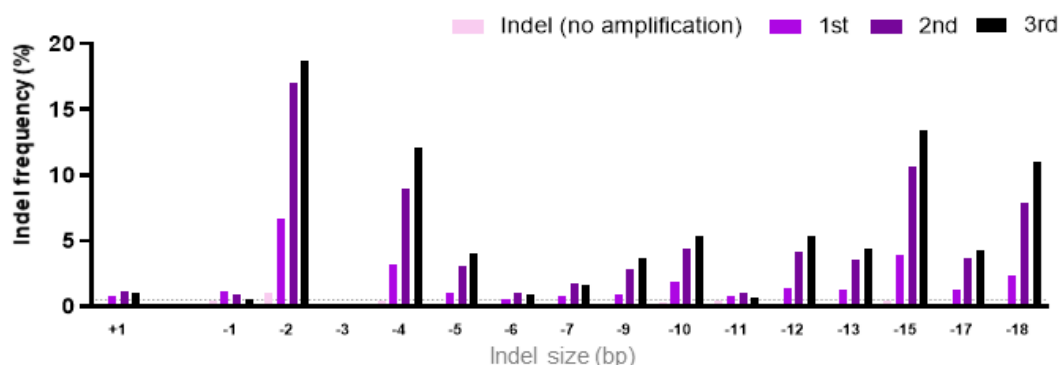

### HEK293 site4 (Off-target 3, 3<sup>rd</sup> enrichment, deletion pattern)

WT AGAAGCAGTGCGGCTAGAGGTGG TGGCTGGGC  
 Del 2 AGAAGCAGTGCGGCTAGA--TGG TGGCTGGGC  
 Del 4 AGAAGCAGTGCGGCTA---TGG TGGCTGGGC  
 Del 5 AGAAGCAGTGCGGCT----TGG TGGCTGGGC  
 Del 9 AGAAGCAGTGC-----TGG TGGCTGGGC  
 Del 12 AGAAGCA-----GTGG TGGCTGGGC  
 Del 13 AGAAGCAGTGC----- -GGCTGGGC  
 Del 15 AGAAGCA-----G TGGCTGGGC  
 Del 17 AGAA-----GG TGGCTGGGC  
 Del 18 AGAAGCAGTGC----- -GGC

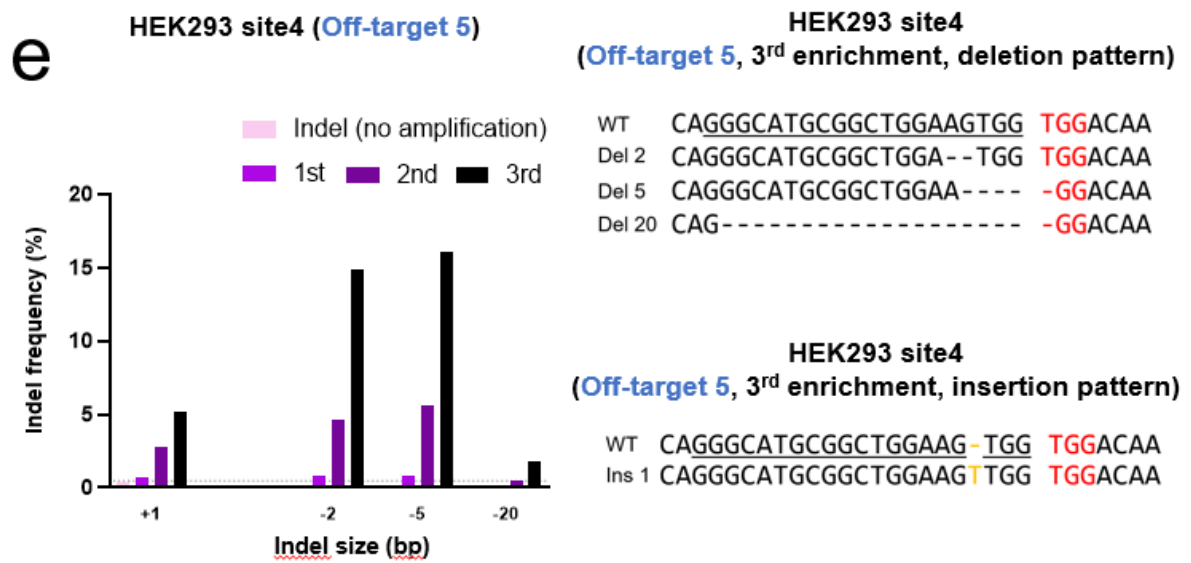

**Supplementary Figure 7. Enriched mutant DNA pattern induced by CRISPR-Cas9 effector at predicted off-target sites for HEK293 site4 target sequence.** NGS analysis of SpCas9 induced indel patterns on HEK293 site4 locus enriched by third round CRISPR amplification for (a) on-target, (b) off-target site1, (c) off-target site2, (d) off-target site3 and (e) off-target site5. PAM sequence (NGG) for SpCas9 is shown in red color. Deleted and inserted DNA bases are shown in dashed line and yellow color, respectively. Each amplification stage for mutant DNA enrichment is shown in pink (no amplification, indel only), light purple (1<sup>st</sup> CRISPR amplification), purple (2<sup>nd</sup> CRISPR amplification) and black (3<sup>rd</sup> CRISPR amplification).

Supplementary Fig.8

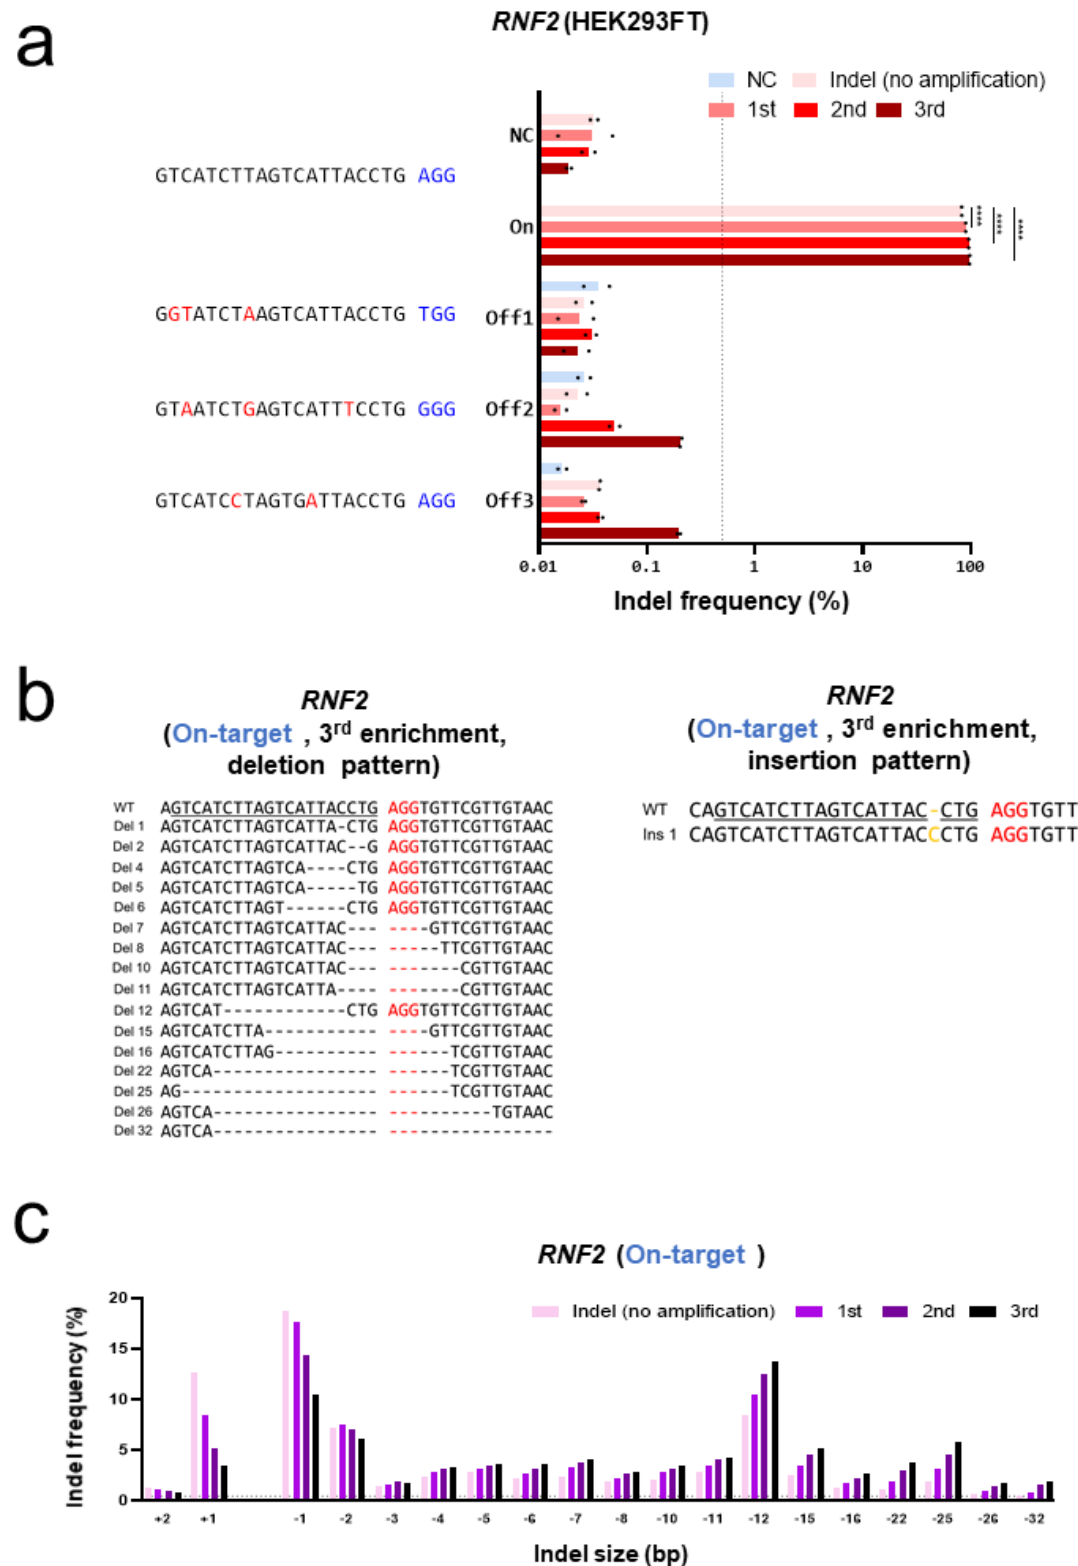

Supplementary Figure 8. Target-specific genome editing and enriched mutant DNA pattern induced by CRISPR-Cas9 effector at predicted off-target sites for

***RNF2* target sequence.** (a) Detection of off-target mutations for the target sequence (*RNF2*) generated by the CRISPR-Cas9 effector in HEK293FT cells. PCR amplicons were generated for on-target and three off-target sequences (The PAM sequence and mismatch to wild-type reference in protospacer is shown in blue and red color, respectively) predicted *in silico* and the indel frequency (%) was analyzed by NGS after sequential CRISPR amplifications. NC indicates a negative control for no Cas9 delivery into the cells. Each amplification stage for mutant DNA enrichment is shown in blue (NC), light pink (no amplification, only indel), pink (1<sup>st</sup> CRISPR amplification), red (2<sup>nd</sup> CRISPR amplification) and dark red (3<sup>rd</sup> CRISPR amplification). The dashed line indicates the NGS detection limit (=0.5%). Data are shown as mean from two (N=2) independent experiments. *P*-values are calculated using a one-way ANOVA, Tukey's test (ns: not significant, *P*\*=0.0332, *P*\*\*=0.0021, *P*\*\*\*=0.0002, *P*\*\*\*\*=0.0001). (b, c) NGS analysis of SpCas9 induced indel patterns on *RNF2* locus enriched by third round CRISPR amplification for on-target. PAM sequence (NGG) for SpCas9 is shown in red color. Deleted and inserted DNA bases are shown in dashed line and yellow color, respectively. Each amplification stage for mutant DNA enrichment is shown in pink (no amplification, indel only), light purple (1<sup>st</sup> CRISPR amplification), purple (2<sup>nd</sup> CRISPR amplification) and black (3<sup>rd</sup> CRISPR amplification).

Supplementary Fig.9

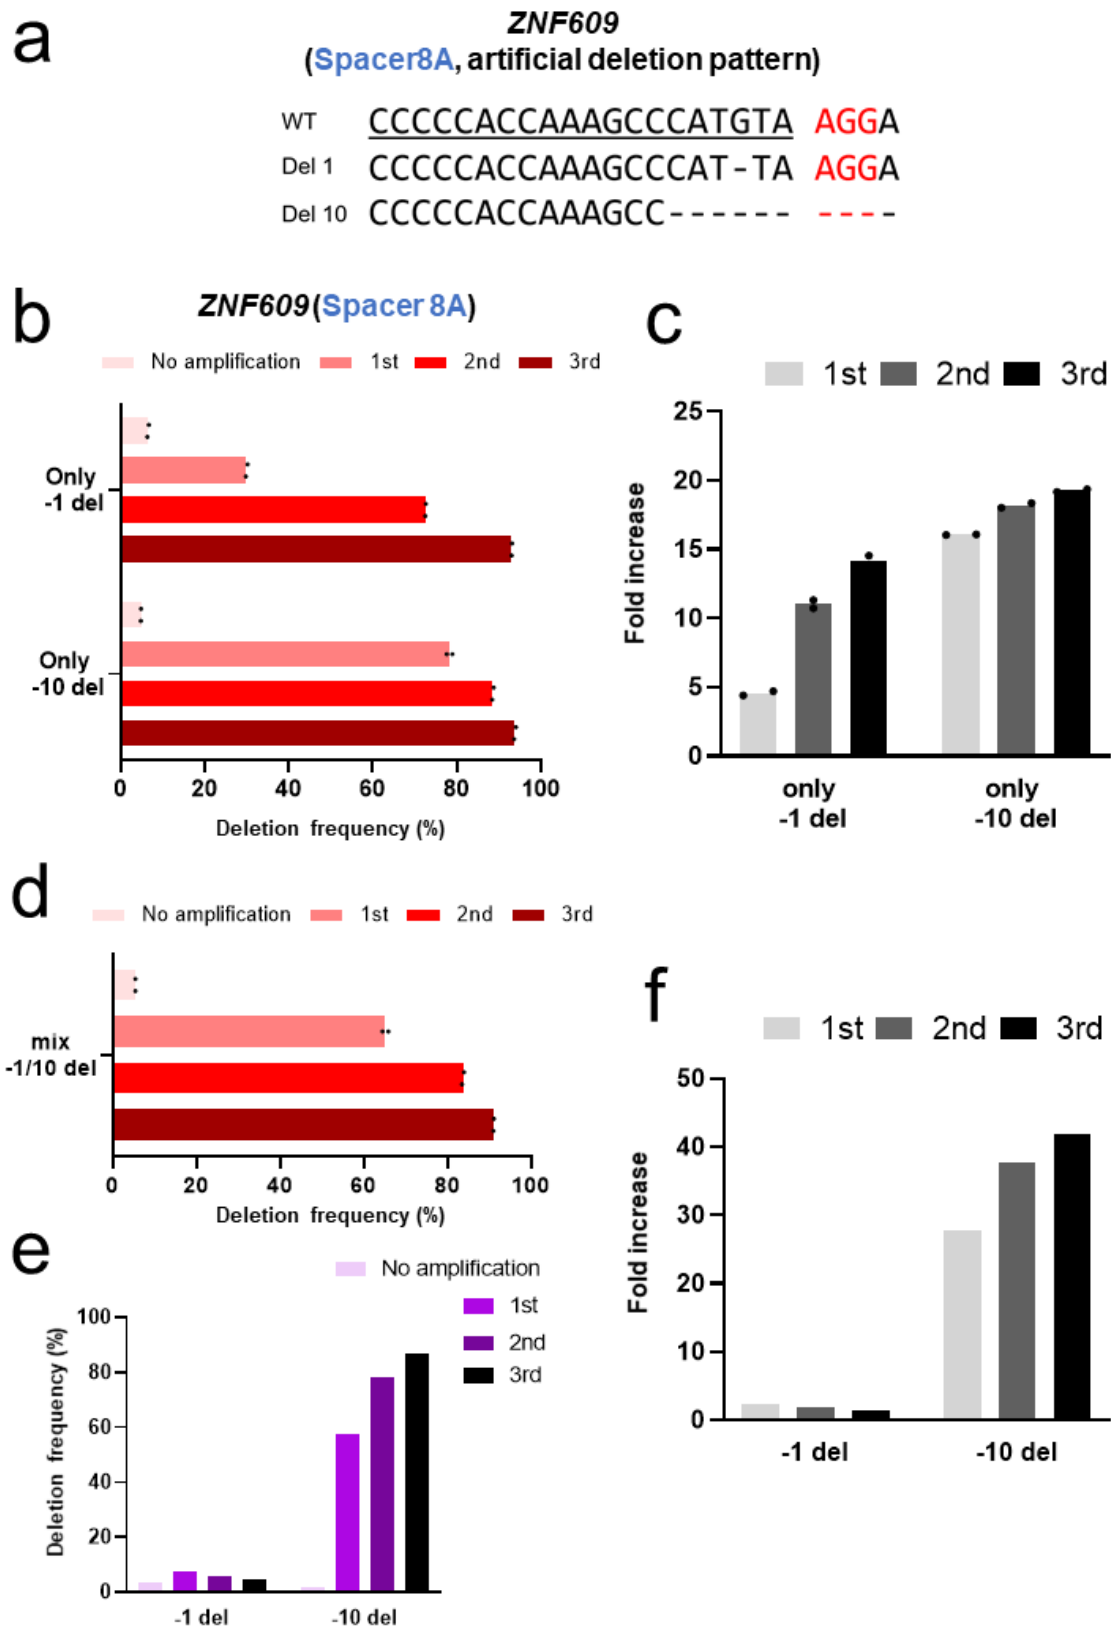

Supplementary Figure 9. Enrichment of the artificially synthesized mutant DNA amplicon with 1bp and 10bp deletions at individual or mixed condition. (a) PCR

amplicons were artificially generated for wild-type (*ZNF609*) and two deleted sequences (Del1, Del10). **(b)** Deletion frequency (%) was analyzed by NGS after sequential CRISPR amplifications with wild-type-Del 1 and wild type-Del 10 amplicon mixture, respectively. Each amplification stage for mutant DNA enrichment is shown in light pink (no amplification), pink (1<sup>st</sup> CRISPR amplification), red (2<sup>nd</sup> CRISPR amplification) and dark red (3<sup>rd</sup> CRISPR amplification). Data are shown as mean from two independent experiments (N=2). **(c)** Fold increase after CRISPR amplification (N=2) for each Del 1 and Del 10 sequence. Primary, secondary, and tertiary CRISPR amplification results are shown in gray, dark gray, and black, respectively. All experiments were conducted at least two times. **(d)** Deletion frequency (%) was analyzed by NGS after sequential CRISPR amplifications with wild-type-Del1-Del10 amplicon mixture. Each amplification stage for mutant DNA mixture enrichment is shown as (b). **(e)** Deletion frequency (%) of each Del 1 and Del 10 pattern was analyzed by NGS after sequential CRISPR amplifications. **(f)** Fold increase after CRISPR amplification (N=2) for each Del 1 and Del 10 sequence from mixed enrichment result. Data is shown as (c).

Supplementary Fig.10

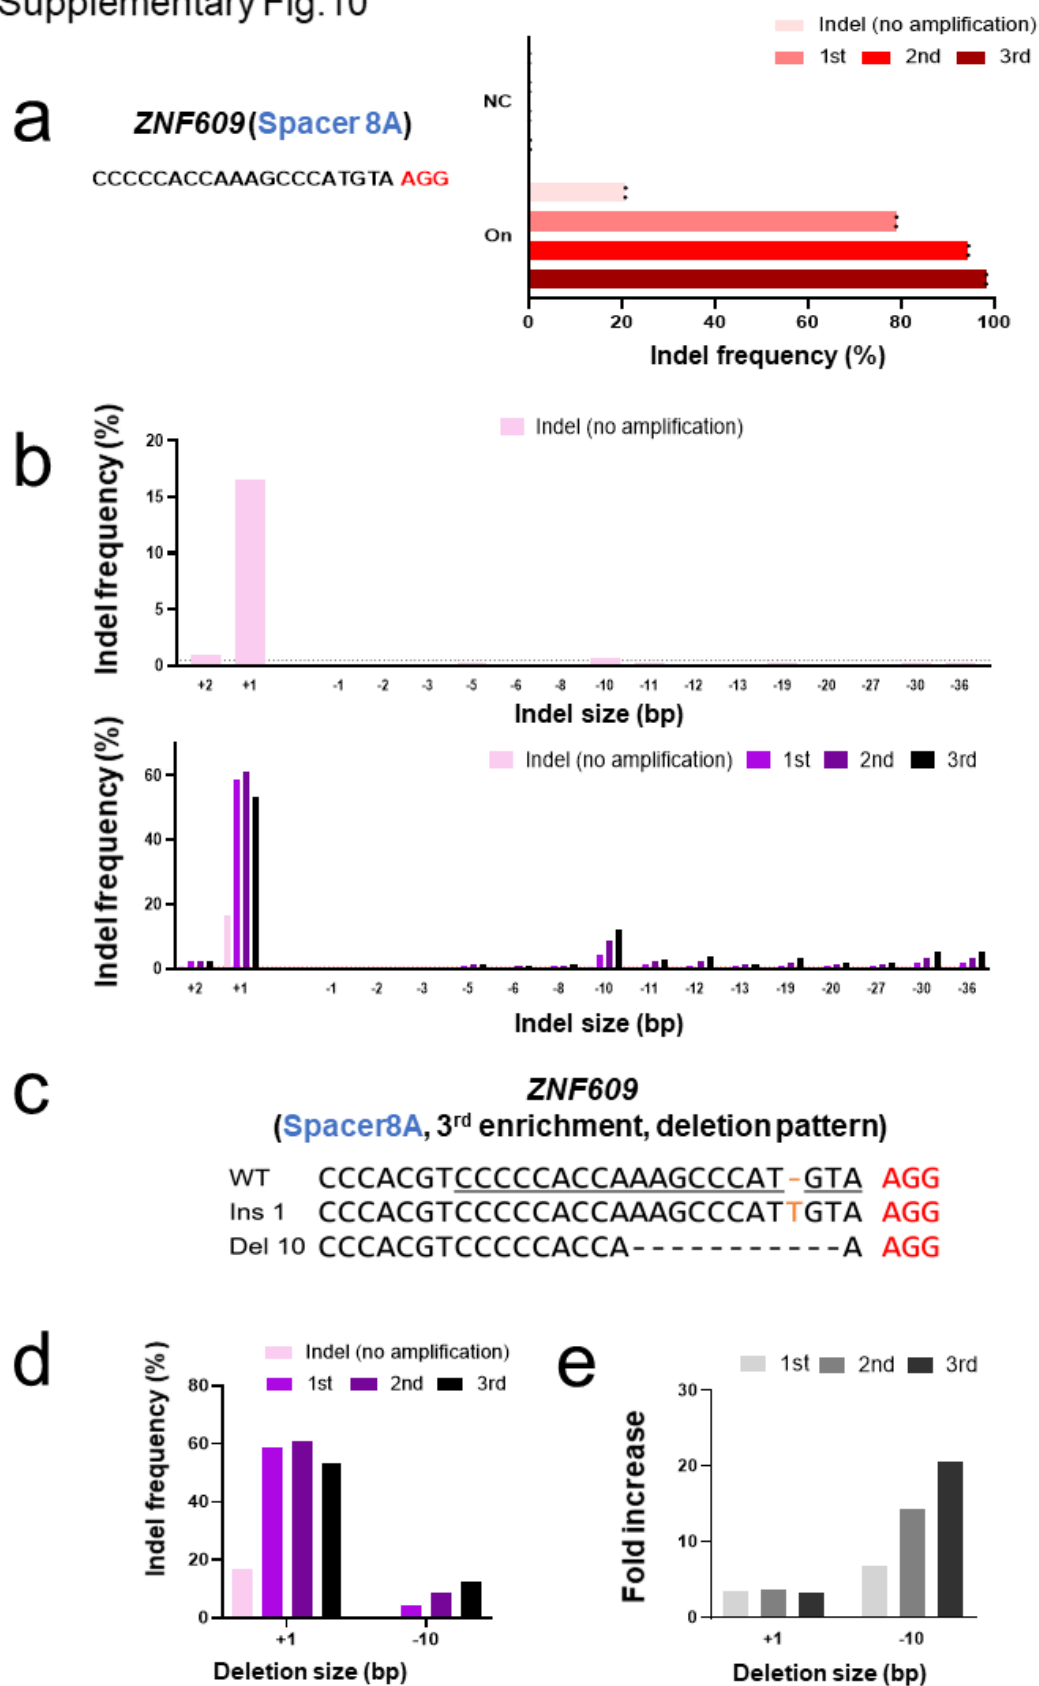

Supplementary Figure 10. Enriched mutant DNA pattern induced by Cas9 effector at *ZNF609* (*Spacer8A*) target sequence. (a) Detection of on-target

mutations for the target sequence (*ZNF609*, Spacer8A) generated by the CRISPR-Cas9 effector in HEK293FT cells. Indel frequency (%) was analyzed by NGS after sequential CRISPR amplifications. Each amplification stage for mutant DNA enrichment is shown in light pink (no amplification, only indel), pink (1<sup>st</sup> CRISPR amplification), red (2<sup>nd</sup> CRISPR amplification) and dark red (3<sup>rd</sup> CRISPR amplification). Data are shown as mean from two (N=2) independent experiments. NC indicates negative control of no Cas9 delivery into cells. **(b)** NGS analysis of CRISPR-Cas9 induced indel frequency on *ZNF609* (Spacer8A) locus. Top: Indel frequency versus various size of indel patterns from NGS sequencing data (a). Bottom: Each mutation frequency of amplification stage for various indel enrichment is shown in pink (no amplification, indel only), light purple (1<sup>st</sup> CRISPR amplification), purple (2<sup>nd</sup> CRISPR amplification) and black (3<sup>rd</sup> CRISPR amplification). **(c)** NGS analysis of CRISPR-Cas9 induced indel patterns on *ZNF609* locus enriched by third round CRISPR amplification. PAM sequence (NGG) for SpCas9 is shown in red color. Deleted and inserted DNA bases are shown in dashed line and yellow color, respectively. **(d)** Magnified view of amplified mutation frequency of 1bp insertion and 10bp deletion. **(e)** Fold increases in *ZNF609* target for 1bp insertion and 10bp deletion mutant DNA after CRISPR amplification (N=2).

Supplementary Fig.11

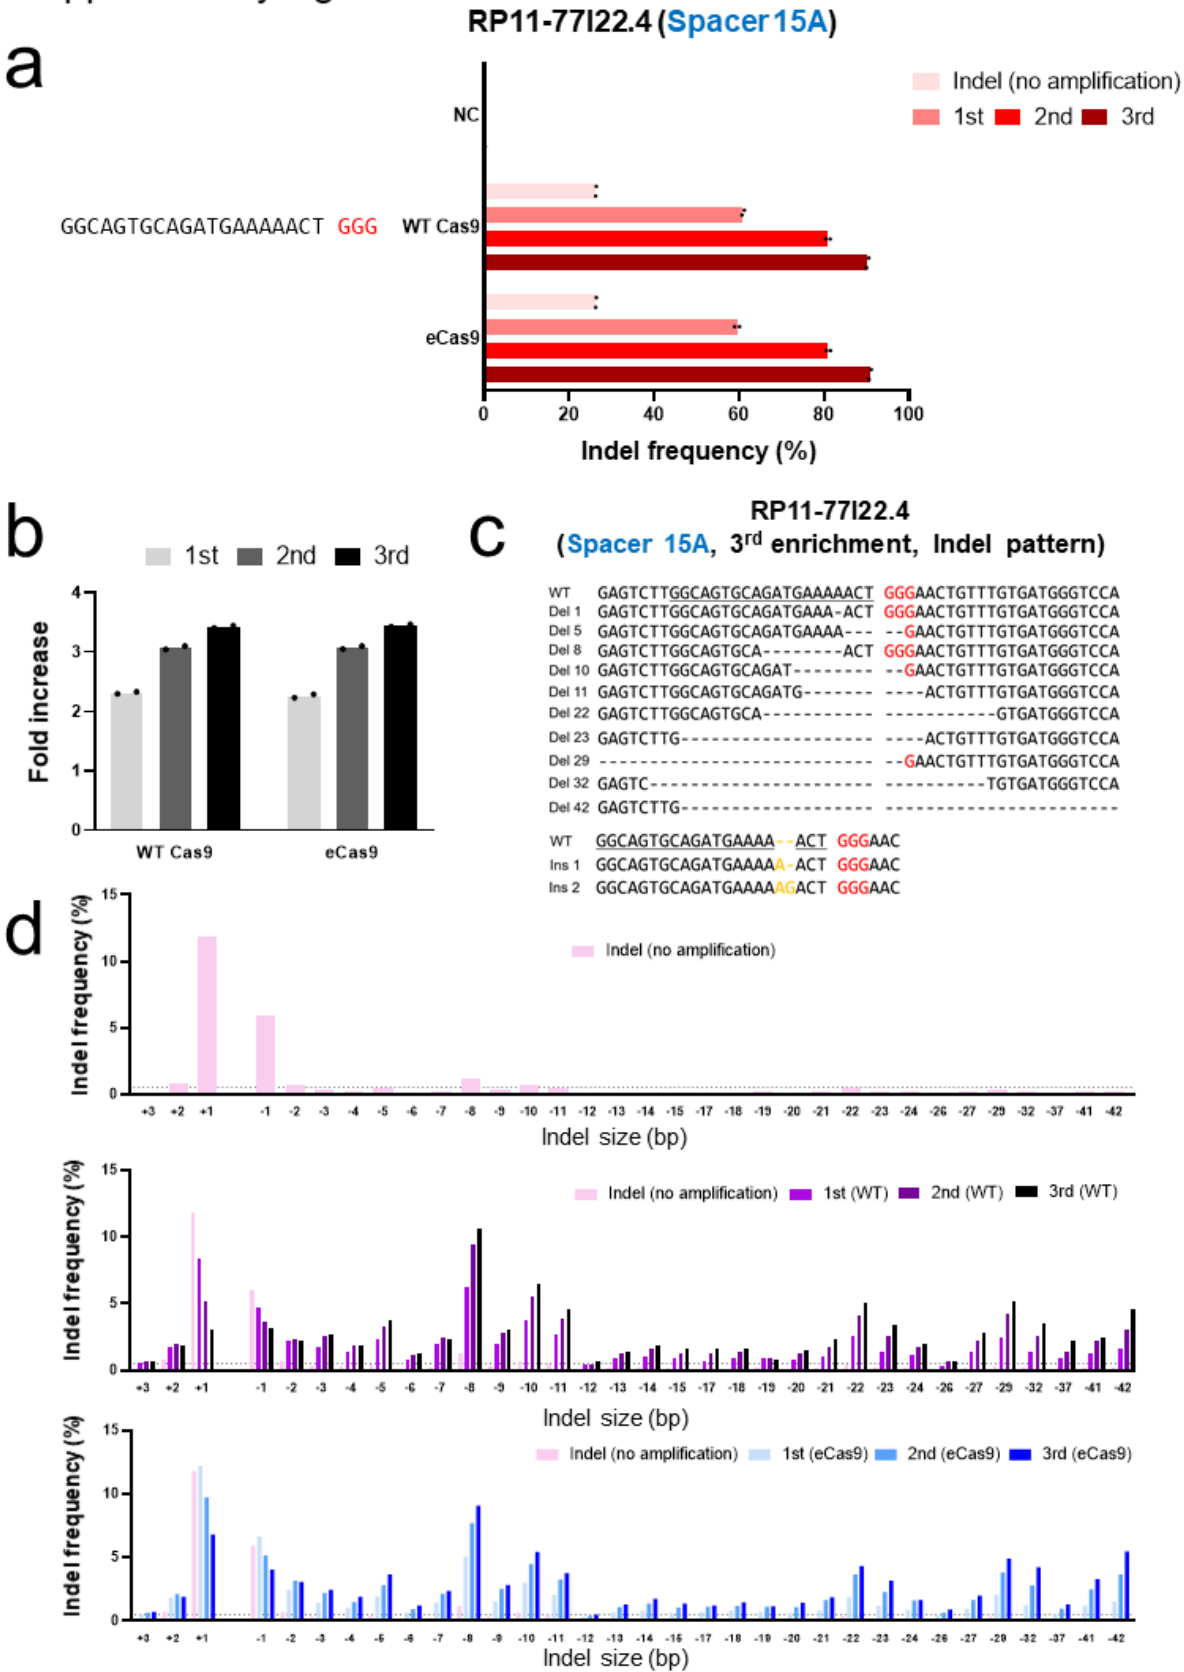

Supplementary Fig.11

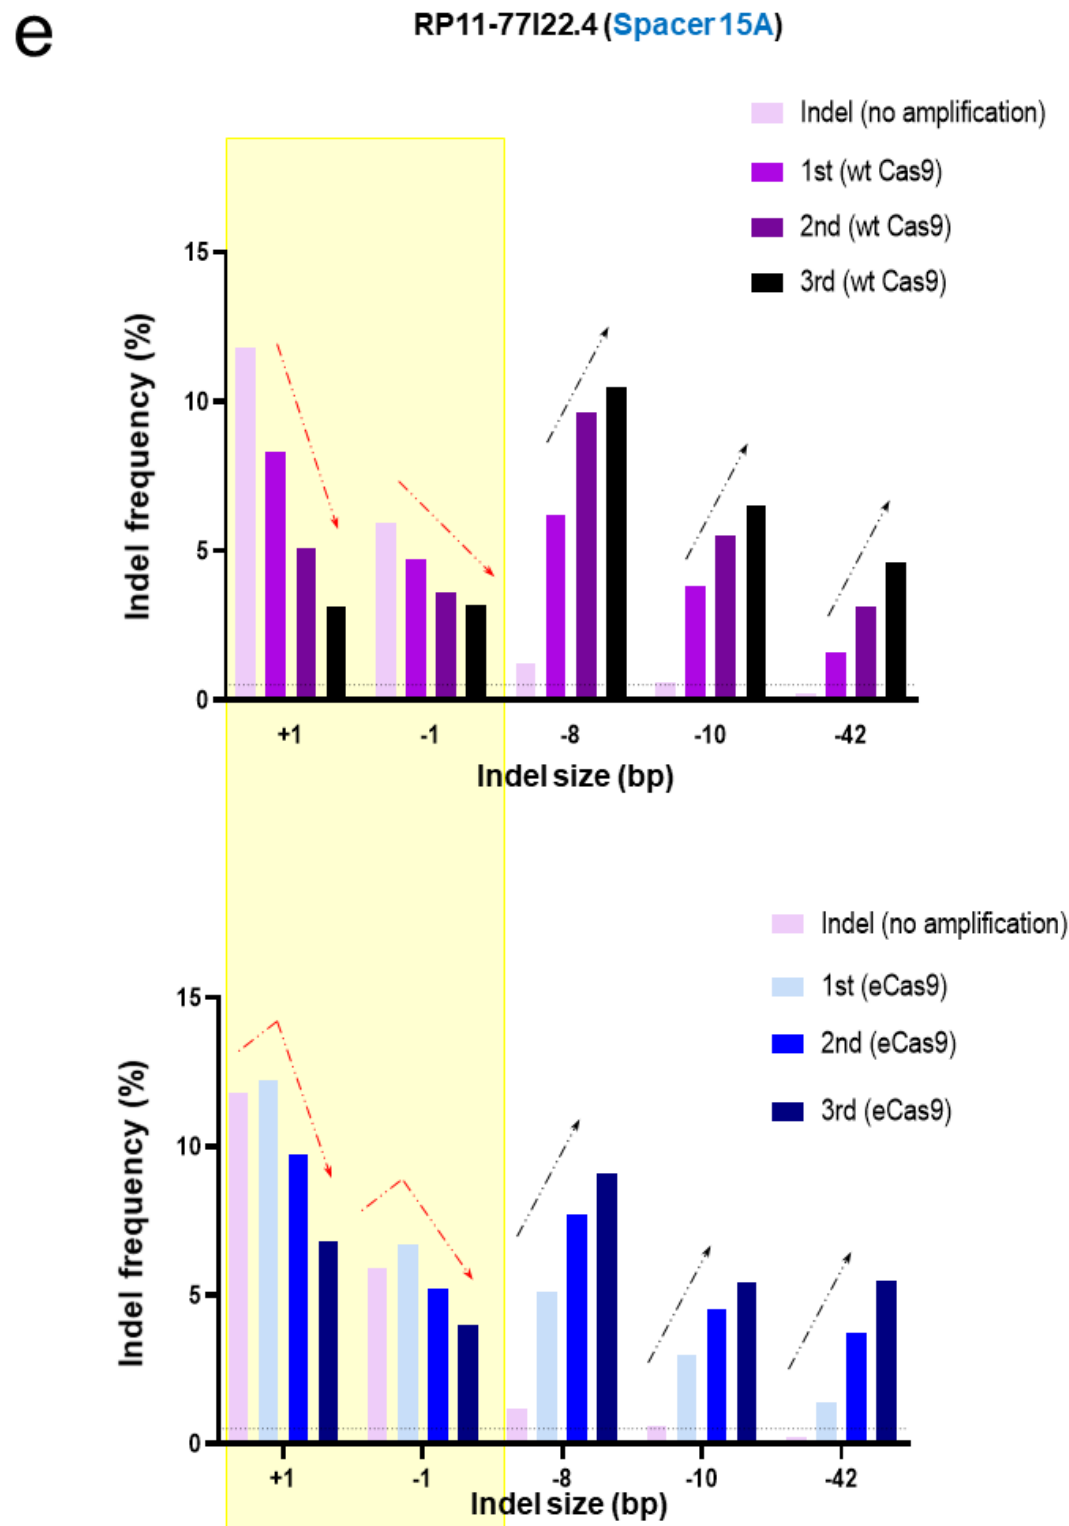

Supplementary Figure 11. Comparison of enrichment property between wild-type Cas9 (wtCas9) and specificity enhanced Cas9 (eCas9). (a) Mutant DNA

amplification with wild-type Cas9 (wtCas9) or specificity enhanced Cas9 (eCas9) for the target sequence (RP11-77122.4 site, Spacer15A) generated by the CRISPR-Cas9 effector in HEK293FT cells. Indel frequency (%) was analyzed by NGS after sequential amplifications with wild-type Cas9 (wtCas9) or specificity enhanced Cas9 (eCas9), respectively. Each amplification stage for mutant DNA enrichment is shown in light pink (no amplification, only indel), pink (1<sup>st</sup> CRISPR amplification), red (2<sup>nd</sup> CRISPR amplification) and dark red (3<sup>rd</sup> CRISPR amplification). Data are shown as mean from two (N=2) independent experiments. NC indicates negative control of no Cas9 delivery into cells. **(b)** Fold increases of mutations in RP11-77122.4 target for wild-type Cas9 (wtCas9) and specificity enhanced Cas9 (eCas9) after CRISPR amplification (N=2). **(c)** NGS analysis of CRISPR-Cas9 induced indel patterns on RP11-77122.4 (Spacer15A) locus. **(d)** NGS analysis of CRISPR-Cas9 induced indel frequency on RP11-77122.4 (Spacer15A) locus. Top: Indel frequency versus various size of indel patterns from NGS sequencing data (a). Middle: Each mutation frequency of amplification stage generated by wild-type Cas9 (wtCas9) is shown in pink (no amplification, indel only), light purple (1<sup>st</sup> CRISPR amplification), purple (2<sup>nd</sup> CRISPR amplification) and black (3<sup>rd</sup> CRISPR amplification). Bottom: Each mutation frequency of amplification stage generated by specificity enhanced Cas9 (eCas9) is shown in pink (no amplification, indel only), light blue (1<sup>st</sup> CRISPR amplification), blue (2<sup>nd</sup> CRISPR amplification) and dark blue (3<sup>rd</sup> CRISPR amplification). **(e)** A magnified histogram comparing the frequency of the mutation (from (d)) amplified using wtCas9 and eCas9, respectively. The yellow-highlighted portion shows the difference in tendency amplified by wtCas9 and eCas9.

Supplementary Fig. 12

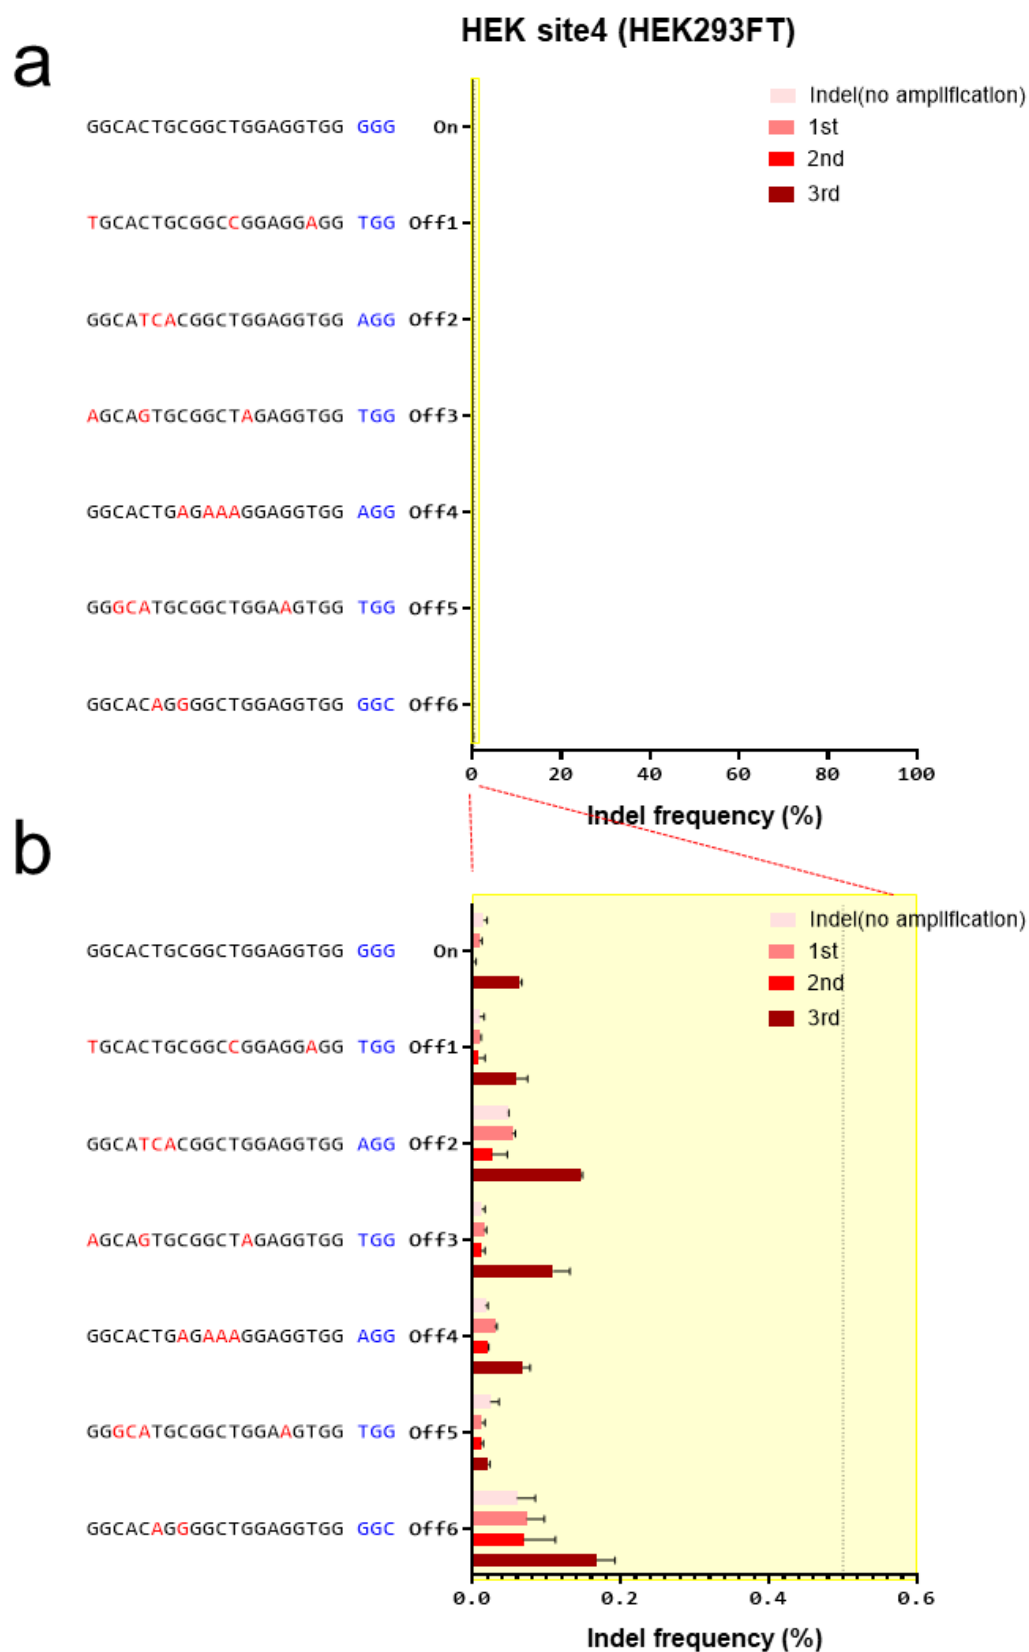

Supplementary Figure 12. The investigation of CRISPR amplification on negative control samples. (a) Detection of mutation frequency (%) for negative

control samples which is corresponding to the on/off target sequence (HEK293 site4) of Fig.3c. PCR amplicons were generated for on-target and six off-target sequences predicted *in silico* and the indel frequency (%) was analyzed by NGS after sequential CRISPR amplifications (N=2). NC indicates a negative control for no CRISPR-Cas9 delivery into the cells. **(b)** A magnified histogram of yellow highlighted region in (a). The dashed dashed line indicates the NGS detection limit (=0.5%).

a

crRNA for enrichment  
gRNA for editing

RPL32P3 site1 on

TTC TTTGGGGTGATCAGACCCAACAGCAGGTCATGGGG  
AAGAAACCCCACTAGTCTGGGTGTCTGCCAGTACCCC

RPL32P3 site1 off 1-3

GGT TTTGGGGTGATCAGACCCAACA CAGGTCATGGGG  
CCAAACCCCACTAGTCTGGGTGTGTGCCAGTACCCC

RPL32P3 site1 off 4

AAAT TTTGGGGTGATCAGGCCCAACA CAGGCCATCAGG  
TTTAAACCCCACTAGTCTGGGTGTGTGCCGGTAGTCC

RPL32P3 site1 off 5

ATT TTTGGGGTGATCAGACCCAAC CCAGGCCATGGGG  
TAAACCCCACTAGTCTGGGTGTGGTGTGCCGGTACCCC

RPL32P3 site1 off 6

TTAT TTTGGGGTGATCAGACCTAACAC TAGGCCATGGGG  
AATAACCCCACTAGTCTGGATTGTGTGCCGGTACCCC

RPL32P3 site1 off 7

AAT TTTGGGGTGATCAACCAACA CAGGACGTGGGT  
TTAAACCCCACTAGTCTGGGTGTGTGTCTGCACCCA

RPL32P3 site1 off 8

AACT TTTGGGGTG CAGACCCAACA CAGGCCATGGGG  
TTGAAACCCCACTGTCTGGGTGTGTGCCGGTACCCC

RPL32P3 site1 off 9

TACT TTTGGGGTG CAGACCCAACA CAGGTCGTGAGG  
ATGAAACCCCACTGTCTGGGTGTGTGTCCAGCACTCC

RPL32P3 site1 off 10

ATAAT TTTGGGTGT CAGGACCAACA CAGGACTAACTA  
TATTAACCCCACTAGTCTGGTGTGTGTCTGTATTGAT

b

crRNA for enrichment  
gRNA for editing

DNMT1 site3 on-target

AATG TTTCTGATGGTCCATGTCTGTACTGCCTGTCA  
TTACAAGGACTACCAAGGTACAGACAATGAGCGGACAGT

DNMT1 site3 off1

GCCAT TTTCTGATGGTCCA C GCTGTTAacaTCAAAATG  
CGGTAAAGGACTACCAAGGTGCGACAATtgtAGTTTTAC

DNMT1 site3 off2

ACCAT TTTCTGATGGTCCATacCTGTTAacaTTAAAATG  
TGGTAAAGGACTACCAAGGTatGACAATtgtAATTTTAC

DNMT1 site3 off3

GAAG TTTCTGATGGTCCATGTCTGaattagACACCCCT  
CTTCAAAGGACTACCAAGGTACAGACTtaatcTGTGGGGA

c

crRNA for enrichment  
gRNA for editing

FAT3 site1 on

GAGCTGCTTAAGCATTTCAAGGGAGAAACCCTGAAACTCT  
CTCGACGAATTCGTAAAGTTCCCTCTTTGGGACTTTGAGA

FAT3 site1 off1

GAGCTaaTTAAaCATTTCAAAGGAAACATTATTTAACTC  
CACGAttAATTtGTAAAGTTCCCTTTGTAATAAAATTGAG

FAT3 site1 off2

aAGCTGCTTctGCATTTCAAAGGCGCTGATTATCACTTTCT  
tTCGACGAagaCGTAAAGTTCCCGGACTAAATAGTGAAAG

FAT3 site1 off3

GAGaTGCagAAGCATTTCAAGGGACAGCCACTACTGAGGC  
CTCtACGtcTTCGTAAAGTTCCCTGTCTGGTGATGACTCCG

d

crRNA for enrichment  
gRNA for editing

PSMB2 site1 on-target

CACCATCTTTTGTACACTCAGAGTAAACAAAGCATAGACTGAGGG  
GTGGTAGAAACATGTGAGTCTCATTGTTCGTATCTGACTCCC

PSMB2 site1 off1

TGCTGCACTCAGTAACATTTCA GTAAACTAatCATAGAtTGAAGG  
ACGACGTGAGTCATTGTAAAGTCATTGTaTtAGTATCTaACTTCC

PSMB2 site1 off2

GCTCAGCACTGGGTATATACTT GcAAACAAAaCAGAGACTGAAGG  
CGAGTCGTGACCATATATGAACgTTTGTTTGTcTCTGACTTCC

PSMB2 site1 off3

TCATTTAATTTTGTAGTGACCT GTAAACAaCagAGACTGAAGG  
AGTAAATTAAAAATCACTGGACATTGTgtgtcTCTGACTTCC

PSMB2 site1 off4

GAGTTAAATAATGTGTAACATGgAAACagAGCATAGaTgATGG  
CTCAATTTATTACACATTGTACcTTTGTcTCGTATCTtACTACC

PSMB2 site1 off5

GTACAGTGTGGAGATAAAAGAC GTAAAGAAAGaATAGtCTGAGGG  
CATGTCAACCTCTATTTCtCATTTCttTATCaGACTCCC

Supplementary Fig. 13

e

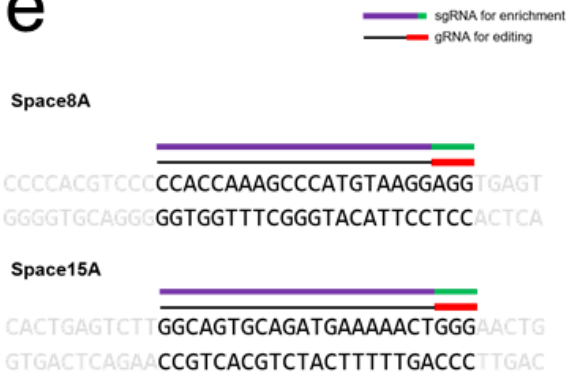

f

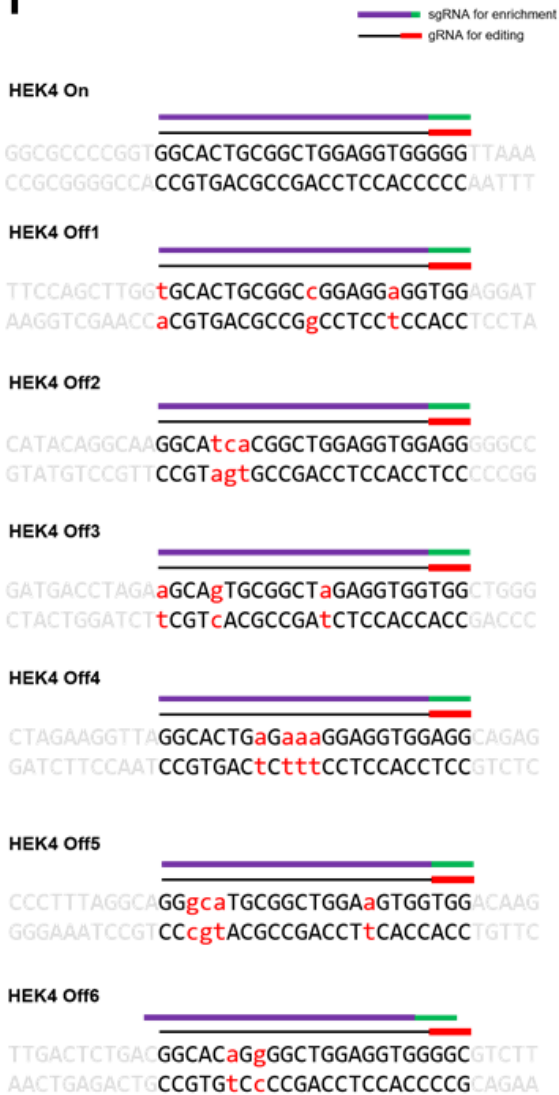

g

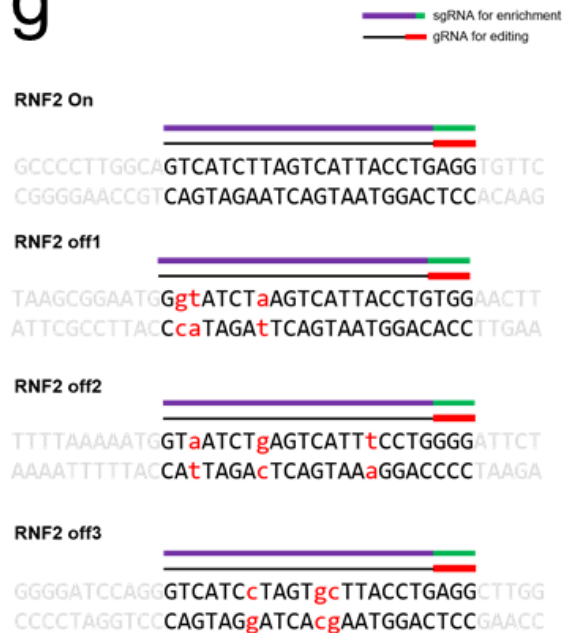

Supplementary Fig.13

Supplementary Figure 13. Design of the guide RNA for wild-type DNA specific

**cleavage and mutant DNA amplification.** Guide RNA (gRNA) was used to induce target genomic locus mutation by various effectors and gRNA was used for target DNA enrichment by CRISPR amplification. Each single-guide and crRNA was designed for **(a)** *RPL32P3* on/off site mutations by Cas12a, **(b)** *DNMT1*-site3 on/off site mutations by Cas12a, **(c)** *FAT3* on/off site mutations by Cas9, **(d)** *PSMB2* on/off site mutations by adenine base editor, **(e)** *Spacer8A*, 15A site mutations by Cas9, **(f)** HEK293 site4 on/off mutations by Cas9, **(g)** *RNF2* on/off site mutations by Cas9. PAM sequence and mismatched sequences within protospacer region is shown in green, red bar and red lower case letter in protospacer, respectively.

## References

1. Kleinstiver, B.P. et al. Genome-wide specificities of CRISPR-Cas Cpf1 nucleases in human cells. *Nat Biotechnol* **34**, 869-874 (2016).
2. Tsai, S.Q. et al. GUIDE-seq enables genome-wide profiling of off-target cleavage by CRISPR-Cas nucleases. *Nat Biotechnol* **33**, 187-197 (2015).
